# Supplementary material for: Characterization of biogenic volatile organic compounds and their oxidation products in a stressed spruce-dominated forest close to a biogas power plant
Source: Copernicus journal article supplement (doi:10.5194/acp-24-13199-2024), 2024-11-29
Supplement: Supplementary file 1 [file acp-24-13199-2024-supplement.pdf]

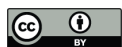

*Supplement of*

## **Characterization of biogenic volatile organic compounds and their oxidation products in a stressed spruce-dominated forest close to a biogas power plant**

**Junwei Song et al.**

*Correspondence to:* Junwei Song ([junwei.song@ircelyon.univ-lyon1.fr](mailto:junwei.song@ircelyon.univ-lyon1.fr)) and Harald Saathoff ([harald.saathoff@kit.edu](mailto:harald.saathoff@kit.edu))

The copyright of individual parts of the supplement might differ from the article licence.

# 1 Supplement

## 2 S1. Data processing of CHARON-PTR-ToF-MS

3 The raw data files of CHARON-PTR-ToF-MS were processed by the Ionicon Data Analyzer  
4 (IDA 1.0.2, Ionicon Analytik). Mass calibrations were performed using four ion peaks including  
5  $\text{H}_3\text{O}^+$  ( $m/z$ 21.022),  $\text{C}_3\text{H}_6\text{OH}^+$  ( $m/z$ 59.049),  $\text{C}_6\text{H}_5\text{I}^+$  ( $m/z$ 203.943) and  $\text{C}_6\text{H}_5\text{I}_2^+$  ( $m/z$  330.848),  
6 where  $\text{C}_6\text{H}_5\text{I}^+$  and  $\text{C}_6\text{H}_5\text{I}_2^+$  were produced from the internal standard diiodobenzene (Ionicon  
7 Analytik). High-resolution peak fitting for each ion was performed automatically by the IDA  
8 software and refined manually according to the PTR-ToF-MS literature (Pagonis et al., 2019;  
9 Yáñez-Serrano et al., 2021). The quantification procedure of CHARON-PTR-ToF-MS data has  
10 been described in detail by (Müller et al., 2017; Leglise et al., 2019). The collision rate ( $k$ ) between  
11 the analyte molecules and PTR reagent ions ( $\text{H}_3\text{O}^+$ ) is calculated based on the parametrization  
12 method (Su and Chesnavich, 1982; Gioumoussis and Stevenson, 1958; Bosque and Sales, 2002).  
13 This method uses the properties of the analyte molecule as input parameters: (i) its molecular  
14 weight, (ii) its molecular polarizability which is calculated from the elemental composition using  
15 the parametrization method and (iii) its dipole moment which is assumed to be 0.3 and 2.75 D for  
16 pure and substituted hydrocarbons, respectively. Assuming no interference of fragmentation, the  
17 maximum uncertainty of this quantification method is  $\pm 40\%$ . The separation of gas and particle  
18 measurement data as well as particle background subtractions were performed with the custom-in  
19 MATLAB script in IDA. Since the PTR-MS shows slow responses to some organic species  
20 especially oxidized species in the particle phase (Piel et al., 2021), the initial 290 s particle-phase  
21 data at each CHARON measurement mode were excluded. We also excluded the last 10 s particle-  
22 phase data at each CHARON measurement mode to avoid any interference from the switching  
23 between different measurement modes. Then the rest of 5 min (300 s) particle data were corrected  
24 by the interpolate subtraction of HEPA filter background. An average enrichment factor of  $\sim 6$  was  
25 used for calculating the mass concentrations of particles measured by the CHARON based on the  
26 CHARON calibration with ammonium nitrate particles (**Fig. S3**) and the ambient measurements  
27 of particle size distribution by the NanoScan SMPS (**Fig. S8**). For the gas phase data, we also  
28 excluded the initial 290 s and the last 10 s data at each VOC measurement mode, which could  
29 minimize the effect of fluctuated drift tube temperature on instrumental sensitivities during first  
30 measurement stage (**Fig. S2a**). Then the rest of 5 min (300 s) gas data were corrected by the

31 background subtraction from the measurement of VOC-free synthetic air. Finally, we averaged the  
32 background-corrected data in gas and particle phases into 5 min presented in this study.

33 It is well-known that the PTR-MS suffers the ionic fragmentation during the protonation  
34 processes (Yuan et al., 2017). According to gas calibrations, the residual fractions were  
35 characterized on average  $\sim 35\% \pm 2\%$  and  $\sim 37\% \pm 2\%$  for protonated isoprene ( $C_5H_9^+$ ,  $m/z69.07$ )  
36 and monoterpenes ( $C_{10}H_{17}^+$ ,  $m/z137.13$ ) respectively after their fragmentation within the  
37 CHARON-PTR-ToF-MS. A previous study has found that the fragmentation of 2-methyl-3-buten-  
38 2-ol (MBO,  $C_5H_{11}O^+$ ) emitted from biogenic sources inside PTR instruments had interferences on  
39 the quantification of isoprene based on the  $C_5H_9^+$  signals (Karl et al., 2012). As shown in **Fig. S15**,  
40 the concentrations of  $C_5H_9^+$  were much higher those of  $C_5H_{11}O^+$  in both CHARON-PTR-ToF-MS  
41 and Vocus-PTR-ToF-MS, and both ions correlated fairly and poorly with each other ( $r= 0.54$  and  
42  $0.09$ ). It indicates that the fragmentation of MBO have no significant influence on the attribution  
43 of  $C_5H_9^+$  to isoprene in this study. Recent studies have found that PTR-measured  $C_5H_9^+$  signals can  
44 be significantly contributed by the fragmentation of cycloalkanes and long-chain aldehydes (e.g.,  
45 octanal and nonanal) emitted from anthropogenic sources such as fossil fuel use and cooking in  
46 urban regions (Pfanterstill et al., 2023; Coggon et al., 2024). In this study, the concentrations of  
47 cycloalkanes and long-chain aldehydes such as octanal ( $C_8H_{17}O^+$ ) and nonanal ( $C_9H_{19}O^+$ ) were two  
48 orders of magnitude lower than that of  $C_5H_9^+$ , thus their interferences were also negligible in this  
49 study. Finally, we scaled the measured data of  $C_5H_9^+$  and  $C_{10}H_{17}^+$  by a factor of 2.86 and 2.70  
50 respectively to quantify the concentrations of isoprene and monoterpenes in this study. For other  
51 calibrated species including benzene, toluene, xylenes, trimethylbenzene, methanol and acetone,  
52 they have minor fragmentation in CHARON-PTR-ToF-MS. Besides, no fragmentation correction  
53 was made for uncalibrated VOC species.

54

## 55 **S2. Comparisons of VOCs between CHARON-PTR-ToF-MS and Vocus-PTR-ToF-MS**

56 With the Vocus-PTR-ToF-MS measurement, 287 VOC ion peaks within the mass range of  $m/z$   
57 40–445 were quantified after background correction. Following selection, 157 VOC ion peaks with  
58 assigned chemical formulas (primarily mainly  $C_xH_y^+$  and  $C_xH_yO_z^+$ ) were used for PMF analysis.  
59 For the CHARON-PTR-ToF-MS measurement, 939 ion peaks were automatically identified using  
60 the IDA software, and 388 of these ions were assigned with chemical formulas (mainly  $C_xH_y^+$  and

61  $C_xH_yO_z^+$ ). After background correction, 112 VOC ions measured by the CHARON-PTR-ToF-MS  
62 were considered for comparison with those simultaneously measured by the Vocus-PTR-ToF-MS.  
63 We first compared the calibrated VOC species measured by the PTR-MS instruments during the  
64 entire measurement campaign. As shown in **Fig. S12**, good agreements were observed for  $C_6H_7^+$   
65 (benzene),  $C_7H_9^+$  (toluene),  $C_8H_{11}^+$  ( $C_8$ -aromatics) and  $C_9H_{13}^+$  ( $C_9$ -aromatics) between CHARON-  
66 PTR-MS and Vocus-PTR-MS within the differences of 10-30%. It should be noted that  $C_5H_9^+$   
67 (isoprene) and  $C_{10}H_{17}^+$  (monoterpenes) were fragmented differently inside CHARON-PTR-ToF-  
68 MS and Vocus-PTR-ToF-MS. To take account into fragmentation corrections, we scaled the  
69 signals of  $C_5H_9^+$  and  $C_{10}H_{17}^+$  measured by the CHARON-PTR-ToF-MS with a factor of 2.86 and  
70 2.70 to obtain the concentrations of isoprene and monoterpenes respectively. Similarly, we scaled  
71 the signals of  $C_5H_9^+$  and  $C_{10}H_{17}^+$  measured by the Vocus-PTR-ToF-MS with a factor of 1.25 and  
72 1.67 to obtain the concentrations of isoprene and monoterpenes respectively. Then good  
73 agreements were observed for isoprene and monoterpenes between CHARON-PTR-ToF-MS and  
74 Vocus-PTR-ToF-MS (**Fig. S12**). We found that  $C_3H_7O^+$  (acetone + propanal) measured by  
75 CHARON-PTR-ToF-MS were higher than that measured by Vocus- PTR-ToF-MS by a factor of  
76  $\sim 2.5$ . The differences of  $C_3H_7O^+$  could be due to PTR-MS fragmentation of higher-molecular-  
77 weight VOCs that produce signals at the ion mass of  $C_3H_7O^+$  or differences in the detection of  
78 acetone and propanal from the two PTR-MS instruments. Besides, the Vocus-PTR-ToF-MS cannot  
79 quantify the concentration of methanol ( $CH_5O^+$ ) due to reduced ion transmission at lower masses  
80 ( $m/z < 40$ ), thus no comparison was made.

81 We also summarized the comparisons of a suite of VOC ions measured by Vocus- PTR-ToF-  
82 MS and CHARON- PTR-ToF-MS during the second measurement stage (22<sup>nd</sup>-30<sup>th</sup> June) in **Table**  
83 **S4**. More than 75 VOC ions measured by these two PTR-MS instruments showed good correlations  
84 ( $r > 0.5$ ). However, the concentrations of these well-correlated VOC ions measured by Vocus-  
85 PTR-ToF-MS were generally higher than those measured by CHARON- PTR-ToF-MS by factors  
86 of 1-10. Note that the total concentrations of major VOC ions measured by the CHARON-PTR-  
87 ToF-MS and the Vocus-PTR-ToF-MS were comparable (**Fig. S4**). Therefore, the differences for  
88 individual VOC species could result from the different sensitivities of each VOC species or  
89 fragmentation patterns between these two instruments. In addition, we employed different  
90 calculation method for the CHARON-PTR-ToF-MS data and the Vocus-PTR-ToF-MS data, which  
91 introduced external differences for the comparison of uncalibrated VOC ions.

92 During the first measurement stage, many VOCs detected by CHARON-PTR-ToF-MS also  
93 correlated with those measured by Vocus-PTR-ToF-MS. However, the actual PTR-MS drift tube  
94 temperatures were different between the first and second measurement stage, which leads to the  
95 disagreement of VOC concentrations over the entire campaign. Here we adopted a simple method  
96 to scale the concentrations of selected VOC ions during the first measurement stage. Specifically,  
97 the selected VOC ions measured by CHARON- PTR-ToF-MS have good correlations with those  
98 measured by Vocus-PTR-ToF-MS during both measurement stages. Then we scaled the  
99 concentrations of each selected VOC ions based on the slope differences of first measurement stage  
100 to second one. This simple correction method was validated with the calibrated VOC species (**Fig.**  
101 **S12**) and useful for other uncalibrated VOC species like oxygenated VOCs and green leaf volatiles  
102 (GLV) species (**Figs. S13 and S14**). Therefore, we can present a consistent VOC data set measured  
103 by CHARON-PTR-ToF-MS for the entire campaign.

104

105

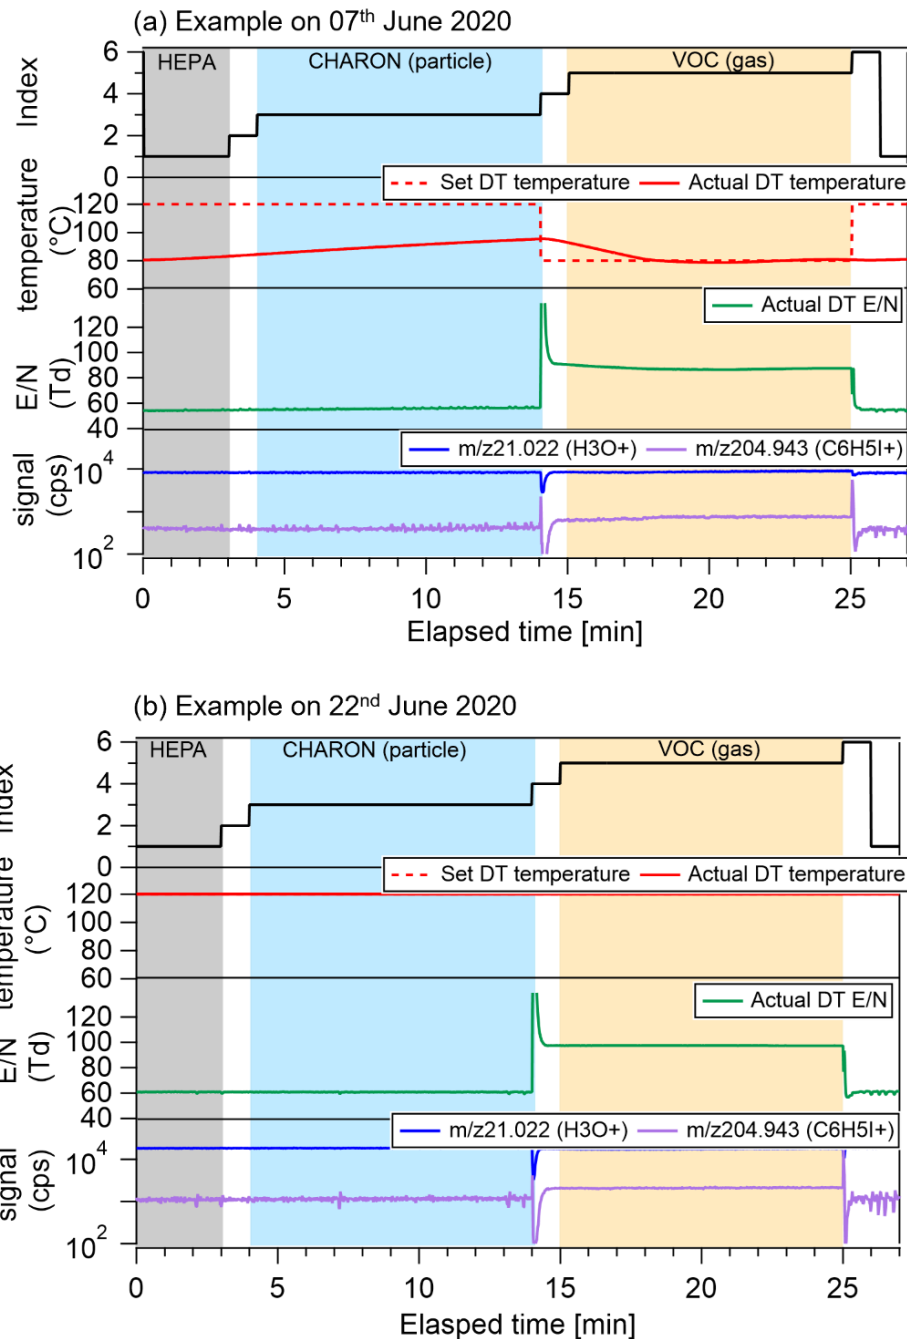

106  
 107 **Figure S1.** Examples of alternatingly measurement cycle in the CHARON-PTR-ToF-MS on (a)  
 108 7<sup>th</sup> of June and (b) 22<sup>nd</sup> of June 2020. Time series of PTR mode index, set and actual PTR drift tube  
 109 (DT) temperature, actual DT E/N value, reagent ion (H<sub>3</sub>O<sup>+</sup>) and mass calibration ion (C<sub>6</sub>H<sub>5</sub>I<sup>+</sup>) for  
 110 the examples.

111

112

113

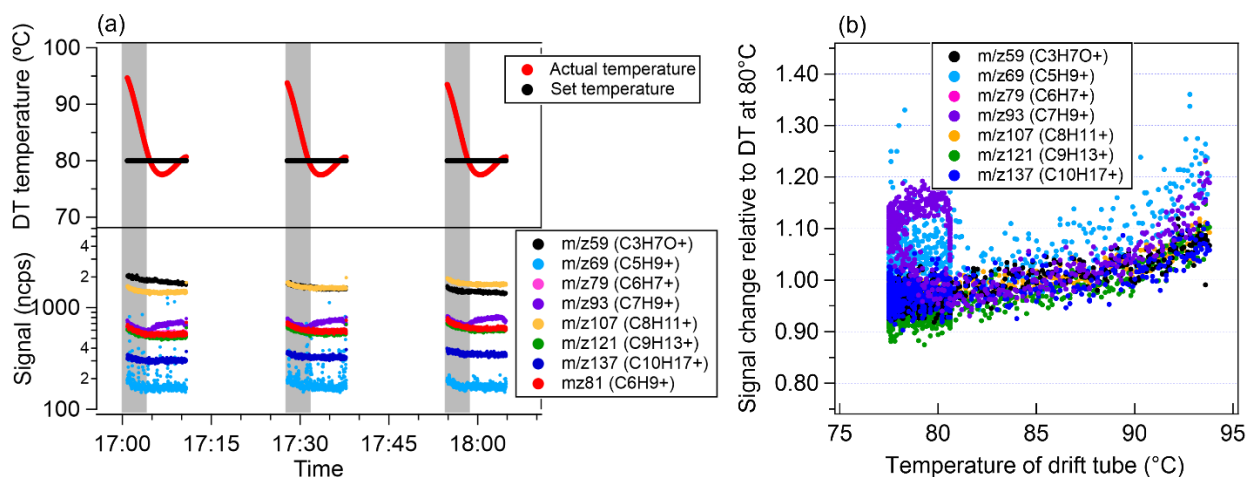

114

115 **Figure S2.** Three alternatingly measurement cycles for the ~100 times diluted IONICON gas  
116 cylinder by the CHARON-PTR-ToF-MS with the same setting during first measurement stage (5<sup>th</sup>-  
117 19<sup>th</sup> of June 2020) of field campaign. (a) Time series of set and actual PTR drift tube (DT)  
118 temperature and the normalized calibrated VOC signals. The grey shaded areas mark the first 4  
119 minutes when the actual DT temperature was rapidly changed back to ~80 °C. (b) Signal change  
120 of VOCs relative to those measured with DT temperature at 80 °C.

121

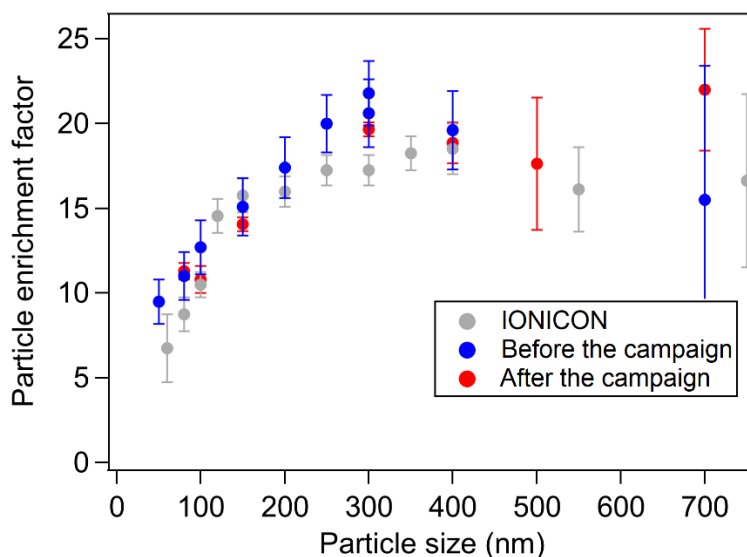

122

123 **Figure S3.** CHARON inlet calibrated enrichment factor of ammonium nitrate as a function of  
124 particle size in the 60-700 nm range before and after the measurement campaign in comparison to  
125 the enrichment factor certified by the IONICON.

126

127

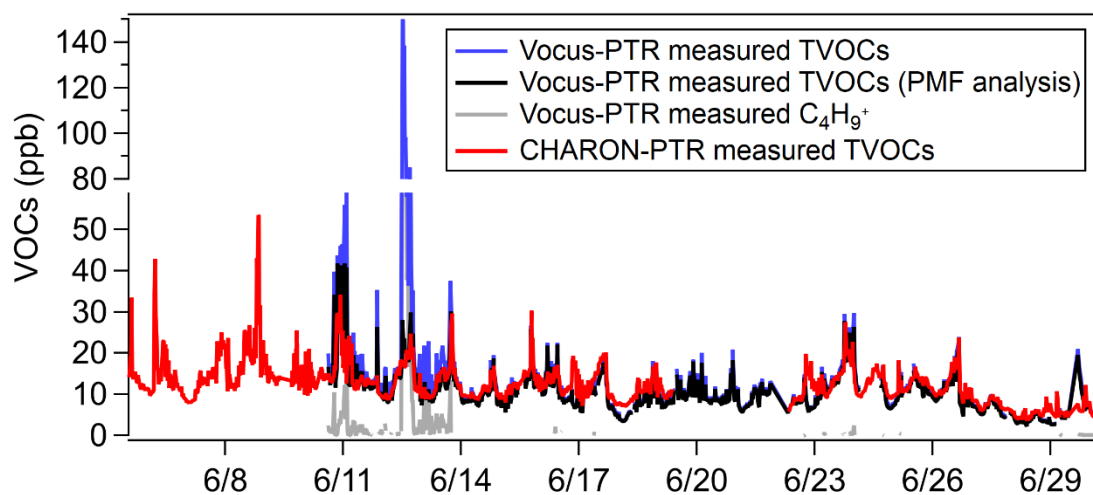

128

129 **Figure S4.** Time series of mixing ratios of 287 VOCs (blue), 157 VOCs ions for the PMF analysis  
130 (black) and C<sub>4</sub>H<sub>9</sub><sup>+</sup> that was measured by the Vocus-PTR-ToF-MS. The total mixing ratios of 112  
131 major VOC ions measured by the CHARON-PTR-ToF-MS (red) is shown for comparison.

132



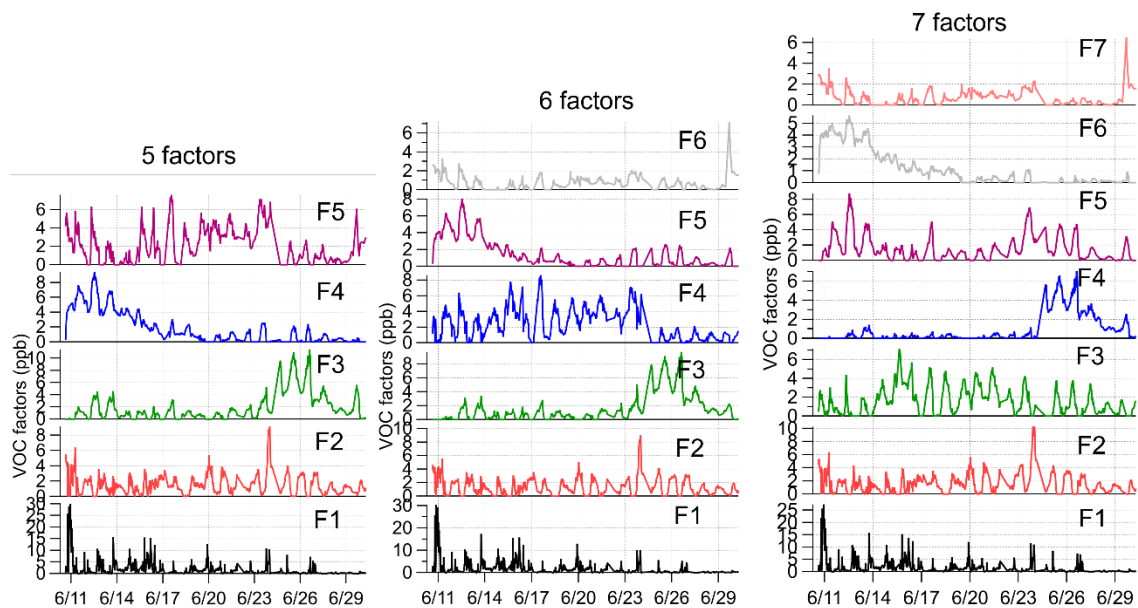

133

134 **Figure S5.** Time series for 5-7 VOC factors resolved from the PMF analysis of Vocus-PTR-ToF-  
 135 MS data. Compared to the 5-factor solution, a new factor F6 was resolved in the 6-factor solution.  
 136 Further increasing factor number to 7 only led to the factor splitting, resulting in uninterpretable  
 137 factor time series.

138

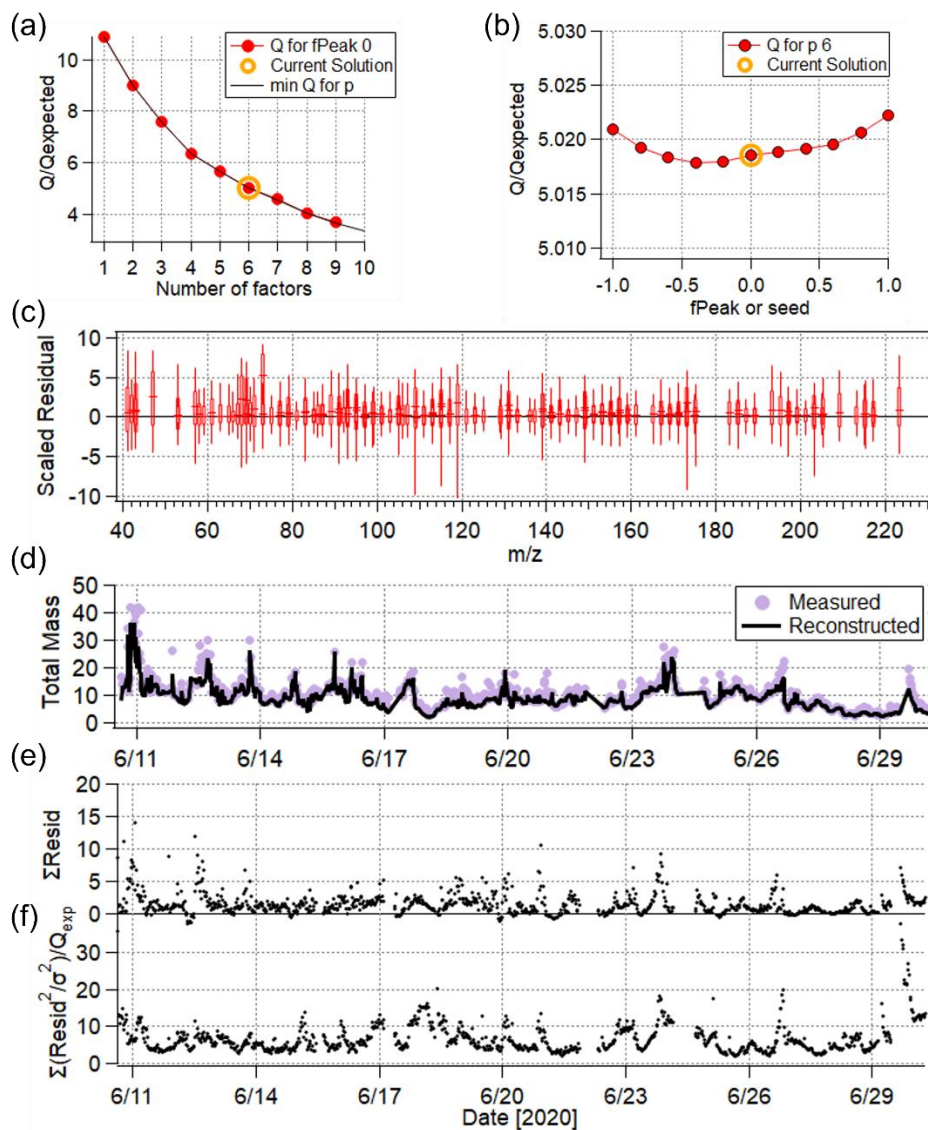

139  
 140 **Figure S6.** A summary of diagnostic plots for the PMF analysis of Vocus-PTR-ToF-MS mass  
 141 spectral data: (a)  $Q/Q_{exp}$  as a function of number of factors; (b)  $Q/Q_{exp}$  as a function of  $f_{peak}$  or  
 142 seed values; (c) scaled residual for each VOC ion; (d) comparison of measured and PMF  
 143 reconstructed mass; (e-f) time series of residual and  $Q/Q_{exp}$  values.

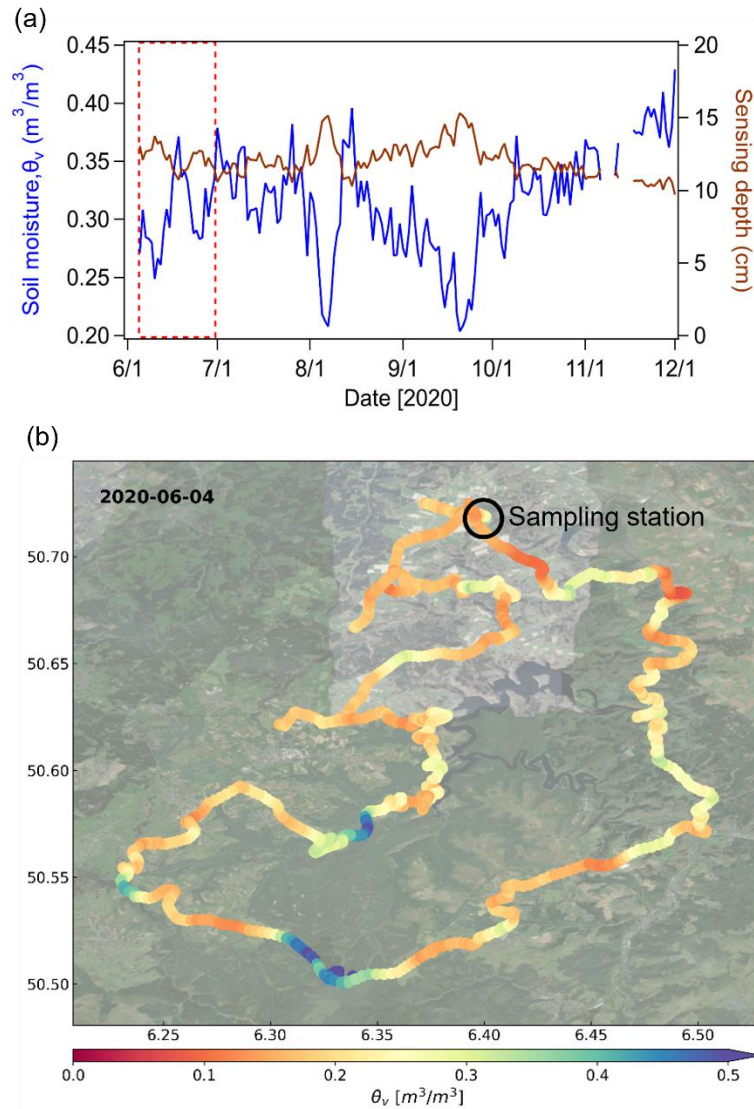

144

145 **Figure S7.** (a) Time series of daily soil moisture ( $\theta_v$ ) and sensing depth measured by a cosmic  
 146 ray neutron sensor (CRNS) which was located  $\sim 150$  m southwest of our sampling site. The red  
 147 dashed box shows the concurrent sampling period at our measurement container during 5<sup>th</sup>-30<sup>th</sup>  
 148 June 2020; (b) Spatial distribution of soil moisture in the northern Eifel derived from the  
 149 measurement by a CRNS rover during 4<sup>th</sup> June 2020 (©Google Earth). The black circle shows  
 150 the location of the sampling container.

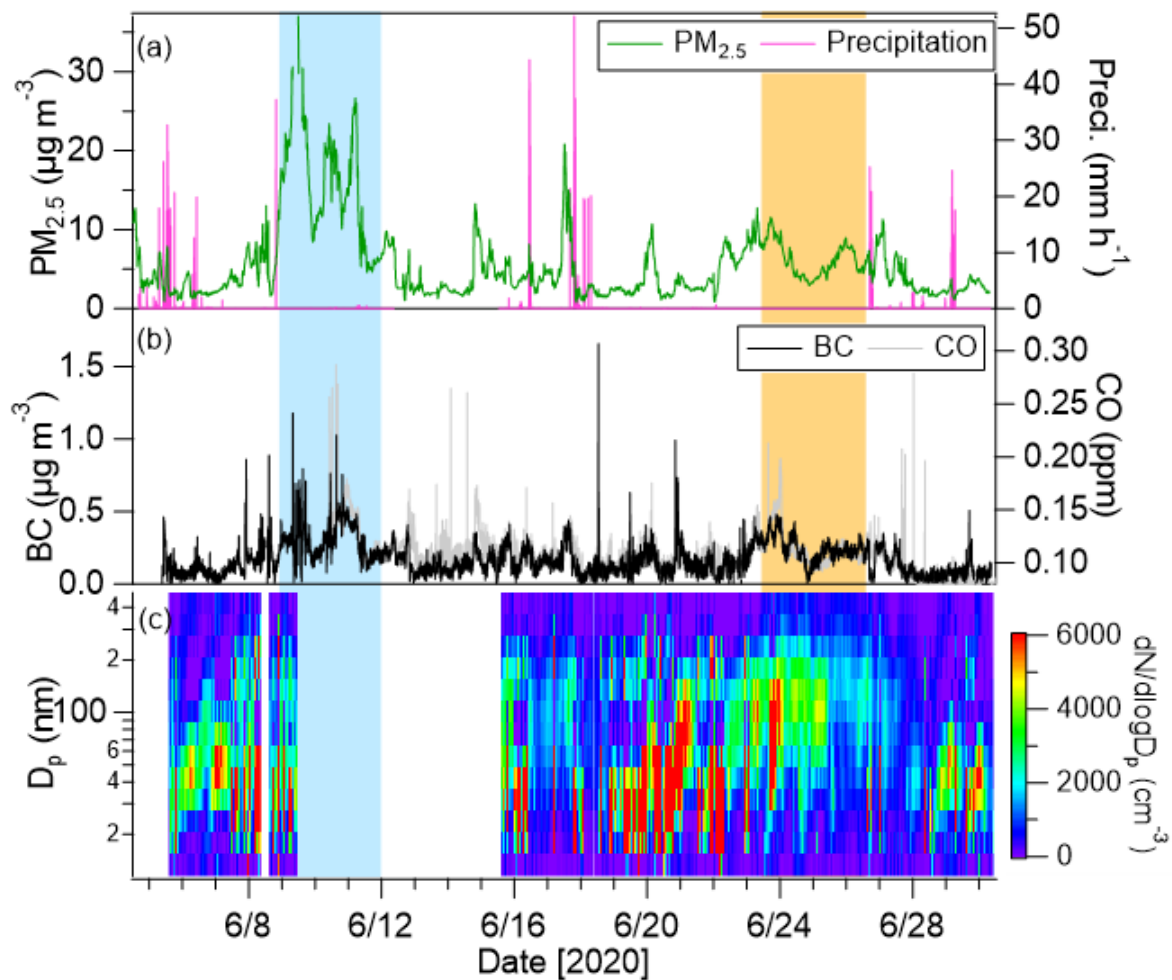

151  
 152 **Figure S8.** Time series of (a)  $\text{PM}_{2.5}$  mass concentrations and precipitation, (b) BC mass  
 153 concentrations and CO. (c) particle number size distributions measured by the NanoScan SMPS.  
 154 The blue and yellow shaded areas mark low-T and high-T episodes.

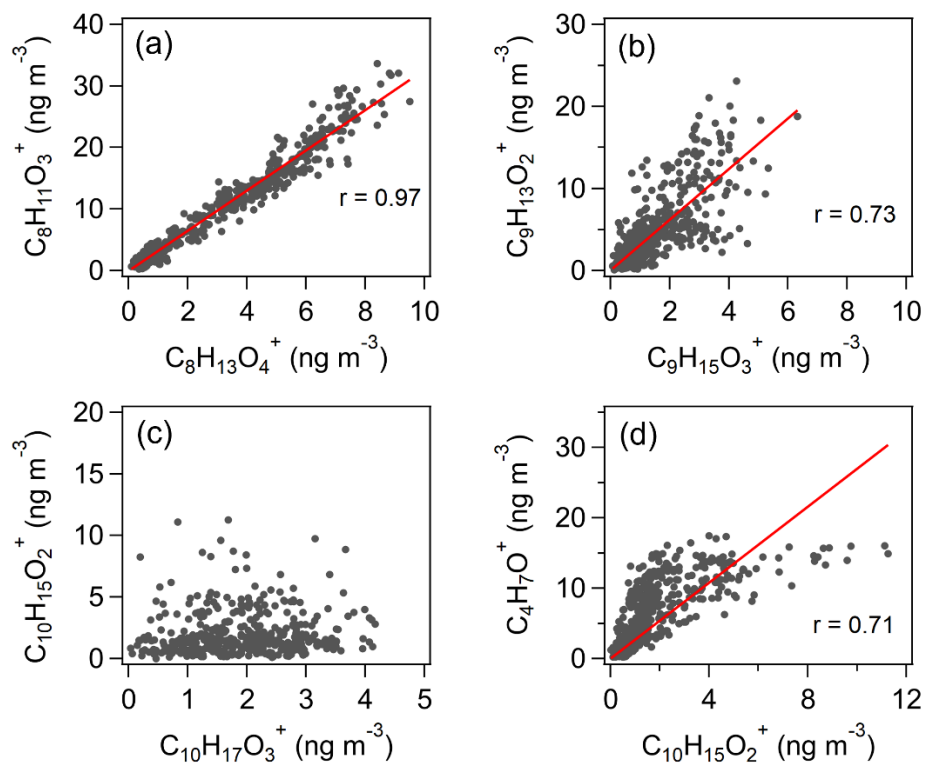

155  
 156 **Figure S9.** Scatter plots of parent ions and their potential fragment ions: (a)  $\text{C}_8\text{H}_{13}\text{O}_4^+$  (norpinic  
 157 acid and its isomers) vs.  $\text{C}_8\text{H}_{11}\text{O}_3^+$ ; (b)  $\text{C}_9\text{H}_{15}\text{O}_3^+$  (norpinonic acid and its isomers) vs.  $\text{C}_9\text{H}_{13}\text{O}_2^+$   
 158 and (c-d)  $\text{C}_{10}\text{H}_{17}\text{O}_3^+$  (cis-pinonic acid and its isomers) vs.  $\text{C}_{10}\text{H}_{15}\text{O}_2^+$  and  $\text{C}_{10}\text{H}_{15}\text{O}_2^+$  vs.  $\text{C}_4\text{H}_7\text{O}^+$ .

159

160

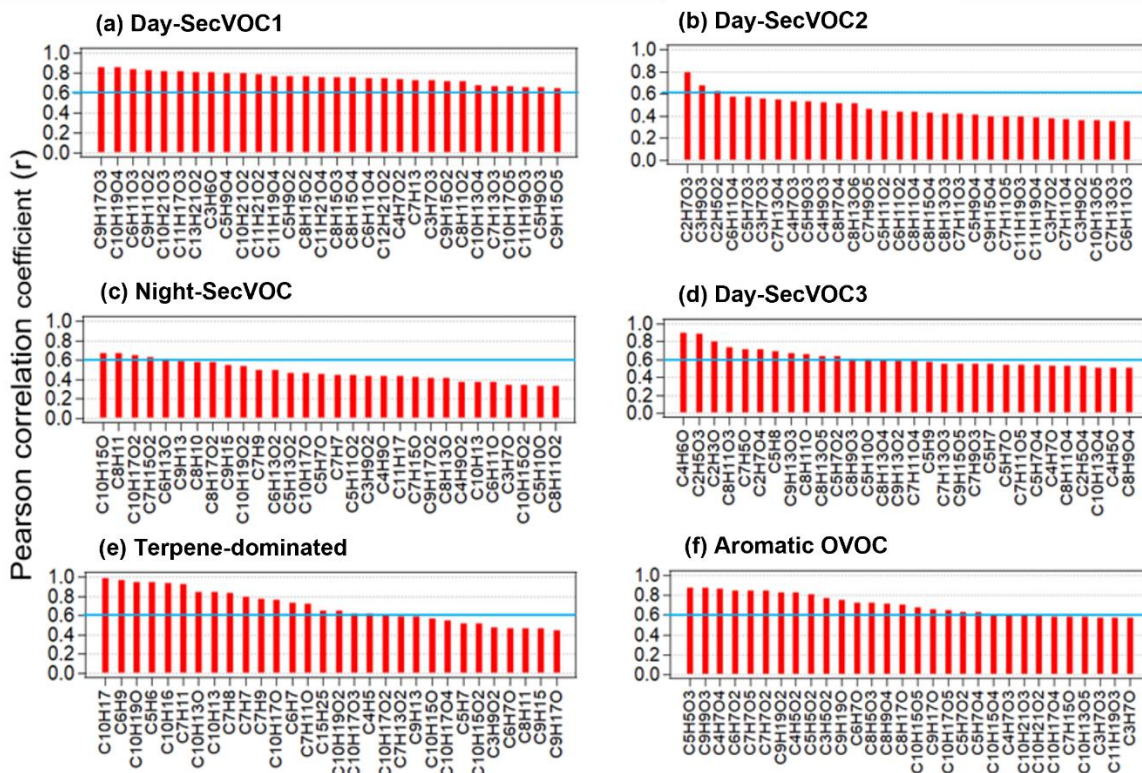

161  
 162 **Figure S10.** Results of the correlation analysis of six VOC factors resolved from the PMF analysis  
 163 of Vocus-PTR-ToF-MS mass spectral data with all VOC ions sorting by correlation coefficient.  
 164 The blue lines mark at  $r = 0.6$  to indicate relatively good correlations.

165

166

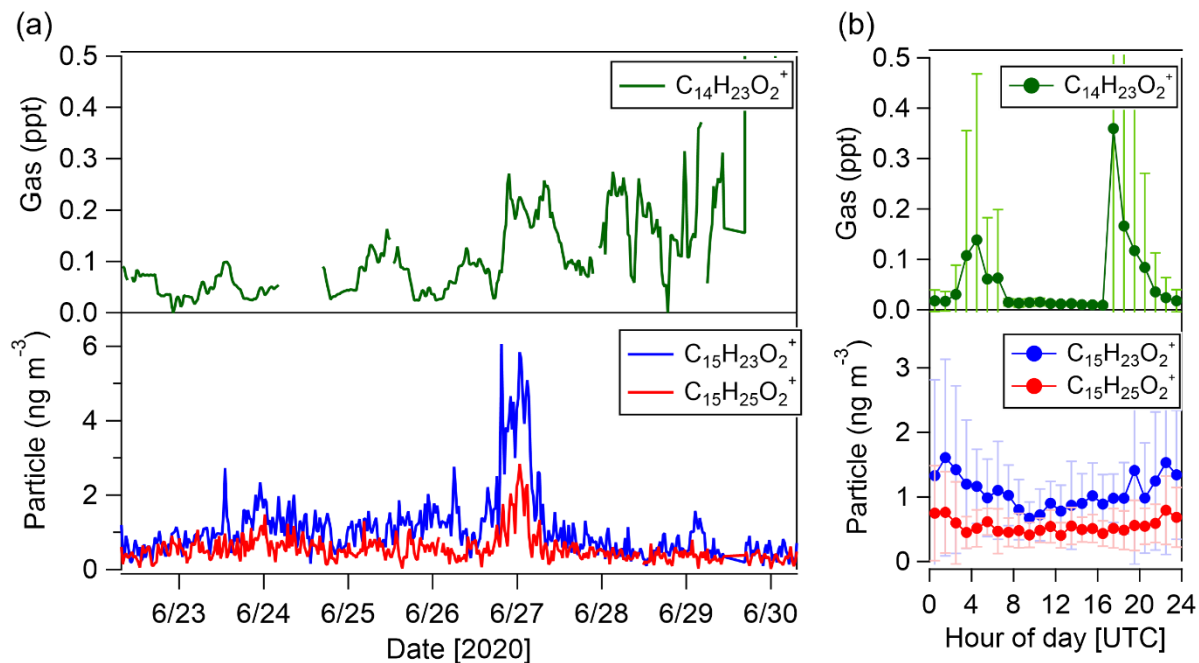

167  
 168 **Figure S11.** Time series of sesquiterpene oxidation products (a)  $C_{14}H_{23}O_2^+$  in gas phase measured  
 169 by the Vocus-PTR-ToF-MS and  $C_{15}H_{23}O_2^+$  and  $C_{15}H_{25}O_2^+$  in particle phase measured by the  
 170 CHARON-PTR-ToF-MS, and (b) their diurnal variations.

171  
 172  
 173  
 174  
 175  
 176

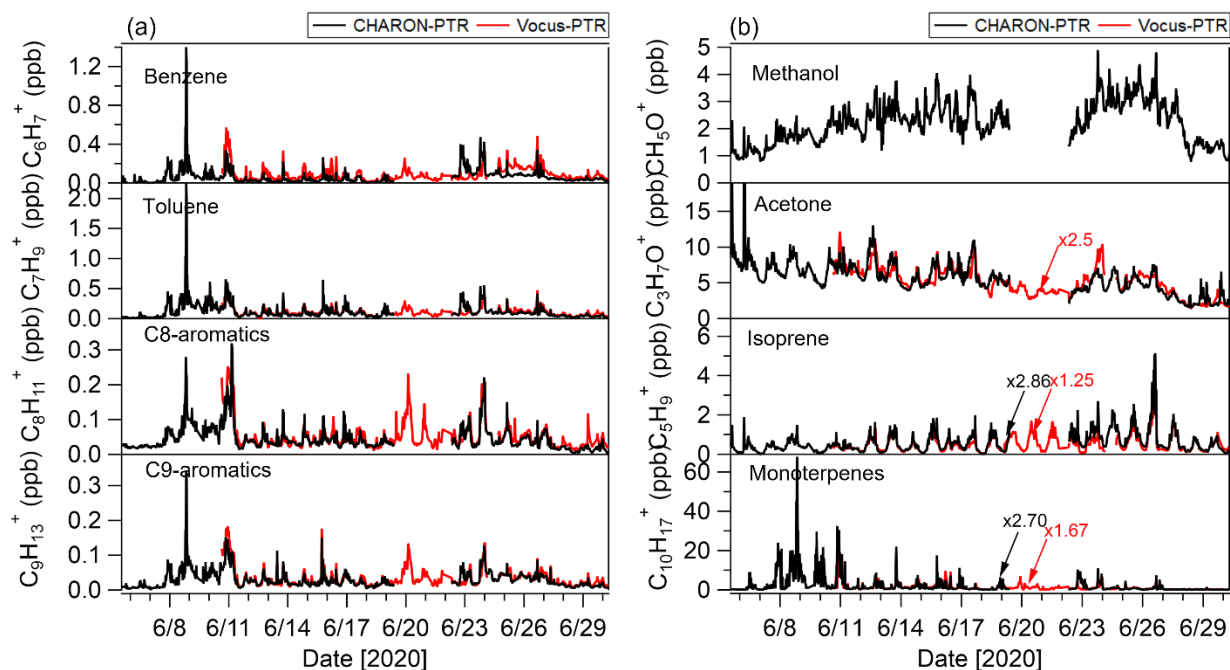

177  
 178 **Figure S12.** Comparisons of VOCs measured by CHARON-PTR-ToF-MS and Vocus-PTR-ToF-  
 179 MS: (a) aromatic hydrocarbons, (b) methanol, acetone, isoprene and monoterpenes. The data of  
 180  $C_5H_9^+$  and  $C_{10}H_{17}^+$  were scaled to obtain the concentrations of isoprene and monoterpenes based  
 181 on their fragmentation patterns in CHARON-PTR-ToF-MS and Vocus-PTR-ToF-MS.

182



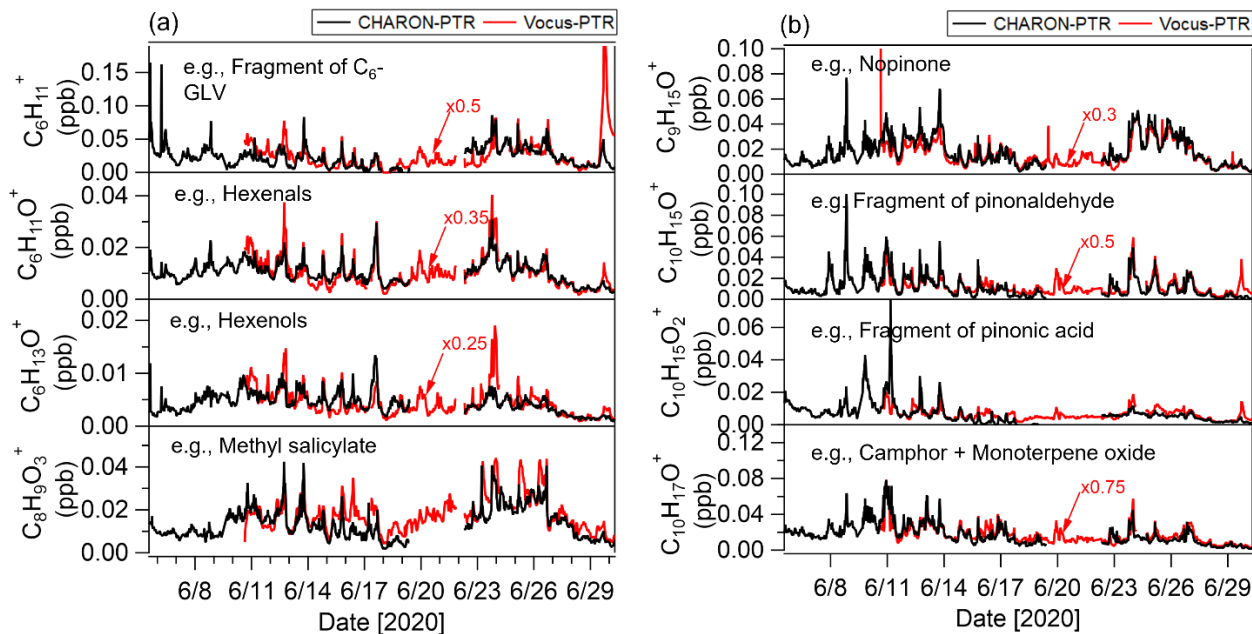

183  
 184 **Figure S13.** Comparisons of VOCs measured by CHARON-PTR-ToF-MS and Vocus-PTR-ToF-  
 185 MS: (a) VOC ions related to green leaf volatiles (GLV), (b) VOC ions related to monoterpene  
 186 oxidation products. The Vocus-PTR-ToF-MS data was scaled for comparison.

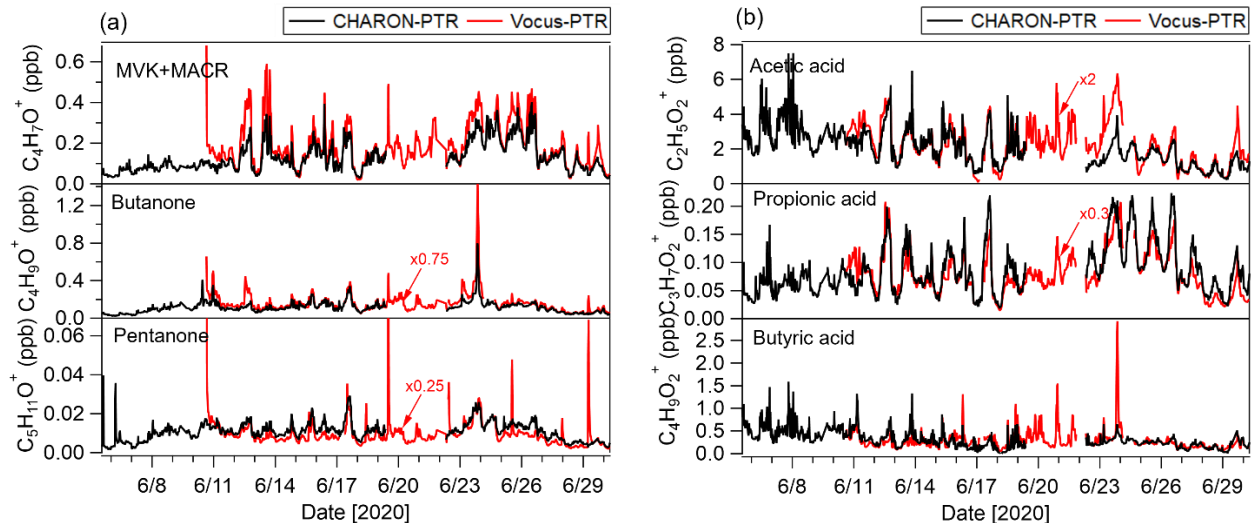

187  
 188 **Figure S14.** Comparisons of VOCs measured by CHARON-PTR-ToF-MS and Vocus-PTR-ToF-  
 189 MS: (a) ketones including methyl vinyl ketone + methacrolein (MVK+MACR), butanone,  
 190 pentanone and (b) acids including acetic acid, propionic acid, butyric acid. The Vocus-PTR-ToF-  
 191 MS data was scaled for comparison.

192

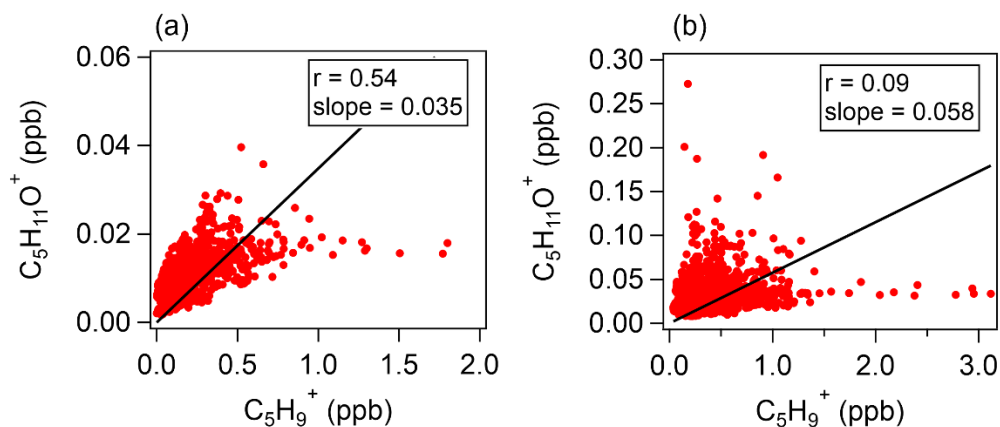

193  
 194 **Figure S15.** Correlation between gaseous  $C_5H_{11}O^+$  and  $C_5H_9^+$  measured by (a) CHARON-PTR-  
 195 ToF-MS and (b) Vocus-PTR-ToF-MS.

196

**Table S1.** Overview of instruments deployed in the measurement container.

| Measured parameters                                              | Instruments                                  | Measurement period |
|------------------------------------------------------------------|----------------------------------------------|--------------------|
| Meteorological parameters                                        | WS700 (Lufft GmbH)                           | 06/05-06/30, 2020  |
| O <sub>3</sub>                                                   | Cranox II (Eco Physics®)                     | 06/10-06/30, 2020  |
| CO, CO <sub>2</sub> , CH <sub>4</sub> , H <sub>2</sub> O         | CRDS (G2401, Picarro Inc.)                   | 06/10-06/30, 2020  |
| Particle number concentration (> 2.5 nm)                         | CPC3776 (TSI Inc.)                           | 06/05-06/12, 2020  |
| Particle size distribution (10-410 nm)                           | NanoScan SMPS3910 (TSI Inc.)                 | 06/05-06/30, 2020  |
| Black carbon (BC)                                                | MA200 (AethLabs Inc.)                        | 06/05-06/30, 2020  |
| Particle concentration (PM <sub>2.5</sub> and PM <sub>10</sub> ) | Fidas200 (Palas GmbH)                        | 06/05-06/30, 2020  |
| VOCs and semi-volatile particles                                 | CHARON-PTR-ToF-MS<br>(IONICON GmbH)          | 06/05-06/30, 2020  |
| VOCs and oxygenated VOCs                                         | Vocus-PTR-ToF-MS<br>(Aerodyne Research Inc.) | 06/10-06/30, 2020  |

197

**Table S2.** Compositions of gas standard for the calibrations of CHARON-PTR-ToF-MS and Vocus-PTR-ToF-MS.

| IONICON certificated gas standard |             | FZJ home-made gas standard |               |
|-----------------------------------|-------------|----------------------------|---------------|
| Components                        | Conc. (ppb) | Components                 | Conc. (ppb)   |
| methanol                          | 98.5 ± 9.1  | methanol                   | 867.7 ± 61.7  |
| acetone                           | 98.0 ± 9.1  | acetonitrile               | 865.4 ± 61.5  |
| isoprene                          | 103.0 ± 9.5 | acetaldehyde               | 1229.3 ± 87.4 |
| benzene                           | 94.0 ± 8.7  | isoprene                   | 815.5 ± 58.0  |
| toluene                           | 97.0 ± 9.0  | benzene                    | 946.7 ± 67.3  |
| o-xylene                          | 102.0 ± 9.4 | toluene                    | 945.4 ± 67.2  |
| p-xylene                          | 98.3 ± 9.1  | o-xylene                   | 946.3 ± 67.3  |
| m-xylene                          | 94.1 ± 8.8  | chlorobenzene              | 962.8 ± 68.4  |
| 1,3,5-trimethylbenzene            | 108.0 ± 9.9 | α-pinene                   | 845.5 ± 60.1  |
| α-pinene                          | 101.0 ± 9.3 | 1-butanol                  | 859.8 ± 61.1  |
| limonene                          | 95.0 ± 8.8  | acetone                    | 1181.5 ± 84.0 |
|                                   |             | 2-butanone                 | 1026.4 ± 73.0 |
|                                   |             | 3-pentanone                | 1045.1 ± 74.3 |
|                                   |             | methyl vinyl ketone        | 1018.4 ± 72.4 |
|                                   |             | (1R)-(+)-norpinone         | 502.9 ± 35.8  |

**Table S3.** List of 157 VOC ions measured by the Vocus-PTR-ToF-MS included for the PMF analysis

| VOC Ion mass (m/z) | Ion formula                                                | Suggested compounds                                  | Averaged mixing ratio (ppb) | Standard deviation |
|--------------------|------------------------------------------------------------|------------------------------------------------------|-----------------------------|--------------------|
| 41.039             | C <sub>3</sub> H <sub>5</sub> <sup>+</sup>                 | fragment                                             | 0.1852                      | 0.4618             |
| 42.034             | C <sub>2</sub> H <sub>4</sub> N <sup>+</sup>               | acetonitrile                                         | 0.0402                      | 0.0213             |
| 43.018             | C <sub>2</sub> H <sub>3</sub> O <sup>+</sup>               | fragment                                             | 0.3649                      | 0.2289             |
| 43.054             | C <sub>3</sub> H <sub>7</sub> <sup>+</sup>                 | fragment                                             | 0.2127                      | 0.5983             |
| 47.049             | C <sub>2</sub> H <sub>7</sub> O <sup>+</sup>               | ethanol                                              | 0.2840                      | 0.3444             |
| 53.002             | C <sub>3</sub> HO <sup>+</sup>                             | unknown                                              | 0.0252                      | 0.0379             |
| 53.039             | C <sub>4</sub> H <sub>5</sub> <sup>+</sup>                 | fragment                                             | 0.0092                      | 0.0076             |
| 57.033             | C <sub>3</sub> H <sub>5</sub> O <sup>+</sup>               | acrolein                                             | 0.1823                      | 0.2125             |
| 58.041             | C <sub>3</sub> H <sub>6</sub> O <sup>+</sup>               | acetone charged transfer                             | 0.0030                      | 0.0019             |
| 59.049             | C <sub>3</sub> H <sub>7</sub> O <sup>+</sup>               | acetone                                              | 2.0768                      | 0.7845             |
| 61.028             | C <sub>2</sub> H <sub>5</sub> O <sub>2</sub> <sup>+</sup>  | acetic acid                                          | 1.1125                      | 0.6110             |
| 63.023             | C <sub>5</sub> H <sub>3</sub> <sup>+</sup>                 | unknown                                              | 0.0113                      | 0.0150             |
| 65.023             | CH <sub>5</sub> O <sub>3</sub> <sup>+</sup>                | unknown                                              | 0.0011                      | 0.0009             |
| 66.046             | C <sub>5</sub> H <sub>6</sub> <sup>+</sup>                 | C <sub>5</sub> H <sub>7</sub> charged transfer       | 0.0015                      | 0.0019             |
| 67.054             | C <sub>5</sub> H <sub>7</sub> <sup>+</sup>                 | fragment                                             | 0.0282                      | 0.0234             |
| 68.062             | C <sub>5</sub> H <sub>8</sub> <sup>+</sup>                 | C <sub>5</sub> H <sub>9</sub> charged transfer       | 0.0019                      | 0.0024             |
| 69.033             | C <sub>4</sub> H <sub>5</sub> O <sup>+</sup>               | furan                                                | 0.0097                      | 0.0062             |
| 69.07              | C <sub>5</sub> H <sub>9</sub> <sup>+</sup>                 | isoprene                                             | 0.4223                      | 0.3694             |
| 70.041             | C <sub>4</sub> H <sub>6</sub> O <sup>+</sup>               | C <sub>4</sub> H <sub>7</sub> O charged transfer     | 0.0006                      | 0.0004             |
| 71.049             | C <sub>4</sub> H <sub>7</sub> O <sup>+</sup>               | MVK/methacrolein                                     | 0.1870                      | 0.1122             |
| 73.028             | C <sub>3</sub> H <sub>5</sub> O <sub>2</sub> <sup>+</sup>  | methyl glyoxal/acrylic acid                          | 0.0467                      | 0.0430             |
| 73.065             | C <sub>4</sub> H <sub>9</sub> O <sup>+</sup>               | MEK/butanal                                          | 0.2158                      | 0.1518             |
| 75.044             | C <sub>3</sub> H <sub>7</sub> O <sub>2</sub> <sup>+</sup>  | acetone water cluster                                | 0.2679                      | 0.1299             |
| 77.023             | C <sub>2</sub> H <sub>5</sub> O <sub>3</sub> <sup>+</sup>  | glycolic acid                                        | 0.0172                      | 0.0167             |
| 77.06              | C <sub>3</sub> H <sub>9</sub> O <sub>2</sub> <sup>+</sup>  | ethylene glycol                                      | 0.5114                      | 0.1969             |
| 79.039             | C <sub>2</sub> H <sub>7</sub> O <sub>3</sub> <sup>+</sup>  | acetic acid cluster                                  | 0.4875                      | 0.3103             |
| 79.054             | C <sub>6</sub> H <sub>7</sub> <sup>+</sup>                 | benzene                                              | 0.0889                      | 0.0788             |
| 81.07              | C <sub>6</sub> H <sub>9</sub> <sup>+</sup>                 | monoterpene fragment                                 | 0.4589                      | 0.6799             |
| 83.049             | C <sub>5</sub> H <sub>7</sub> O <sup>+</sup>               | methyl furan                                         | 0.0323                      | 0.0176             |
| 83.086             | C <sub>6</sub> H <sub>11</sub> <sup>+</sup>                | fragment                                             | 0.0503                      | 0.0488             |
| 85.028             | C <sub>4</sub> H <sub>5</sub> O <sub>2</sub> <sup>+</sup>  | furanone/hydroxy furan                               | 0.0217                      | 0.0141             |
| 85.065             | C <sub>5</sub> H <sub>9</sub> O <sup>+</sup>               | methylcyclopentane                                   | 0.0322                      | 0.0161             |
| 86.073             | C <sub>5</sub> H <sub>10</sub> O <sup>+</sup>              | C <sub>5</sub> H <sub>11</sub> O charged transfer    | 0.0004                      | 0.0002             |
| 87.044             | C <sub>4</sub> H <sub>7</sub> O <sub>2</sub> <sup>+</sup>  | 2,3-butanedione/butyrolactone                        | 0.1783                      | 0.1107             |
| 87.08              | C <sub>5</sub> H <sub>11</sub> O <sup>+</sup>              | pentanal/pentanone/3-methylbutanal/allyl ethyl ether | 0.0399                      | 0.0490             |
| 89.06              | C <sub>4</sub> H <sub>9</sub> O <sub>2</sub> <sup>+</sup>  | ethyl acetate/butanoic acid                          | 0.2904                      | 0.2370             |
| 91.039             | C <sub>3</sub> H <sub>7</sub> O <sub>3</sub> <sup>+</sup>  | lactic acid                                          | 0.0260                      | 0.0144             |
| 91.054             | C <sub>7</sub> H <sub>7</sub> <sup>+</sup>                 | fragment                                             | 0.0171                      | 0.0152             |
| 91.075             | C <sub>4</sub> H <sub>11</sub> O <sub>2</sub> <sup>+</sup> | water cluster of C <sub>4</sub> H <sub>9</sub> O     | 0.0645                      | 0.0732             |
| 92.062             | C <sub>7</sub> H <sub>8</sub> <sup>+</sup>                 | toluene charged transfer                             | 0.0060                      | 0.0068             |

|         |                                                            |                                                    |        |        |
|---------|------------------------------------------------------------|----------------------------------------------------|--------|--------|
| 93.018  | C <sub>2</sub> H <sub>5</sub> O <sub>4</sub> <sup>+</sup>  | unknown                                            | 0.0008 | 0.0007 |
| 93.055  | C <sub>3</sub> H <sub>9</sub> O <sub>3</sub> <sup>+</sup>  | propionic acid water cluster                       | 0.0363 | 0.0170 |
| 93.07   | C <sub>7</sub> H <sub>9</sub> <sup>+</sup>                 | toluene                                            | 0.1096 | 0.0742 |
| 95.034  | C <sub>2</sub> H <sub>7</sub> O <sub>4</sub> <sup>+</sup>  | unknown                                            | 0.0074 | 0.0058 |
| 95.049  | C <sub>6</sub> H <sub>7</sub> O <sup>+</sup>               | phenol                                             | 0.0747 | 0.0581 |
| 95.086  | C <sub>7</sub> H <sub>11</sub> <sup>+</sup>                | monoterpene fragment                               | 0.0364 | 0.0420 |
| 97.028  | C <sub>5</sub> H <sub>5</sub> O <sub>2</sub> <sup>+</sup>  | furfural                                           | 0.0276 | 0.0195 |
| 97.065  | C <sub>6</sub> H <sub>9</sub> O <sup>+</sup>               | 2-ethylfuran/2,5-dimethylfuran                     | 0.0166 | 0.0073 |
| 97.101  | C <sub>7</sub> H <sub>13</sub> <sup>+</sup>                | fragment                                           | 0.0116 | 0.0142 |
| 99.044  | C <sub>5</sub> H <sub>7</sub> O <sub>2</sub> <sup>+</sup>  | furfuryl alcohol                                   | 0.0537 | 0.0329 |
| 99.08   | C <sub>6</sub> H <sub>11</sub> O <sup>+</sup>              | cyclohexanone                                      | 0.0293 | 0.0173 |
| 101.06  | C <sub>5</sub> H <sub>9</sub> O <sub>2</sub> <sup>+</sup>  | methyl methacrylate                                | 0.0971 | 0.0551 |
| 101.096 | C <sub>6</sub> H <sub>13</sub> O <sup>+</sup>              | hexanals/hexanones                                 | 0.0177 | 0.0105 |
| 103.039 | C <sub>4</sub> H <sub>7</sub> O <sub>3</sub> <sup>+</sup>  | acetic anhydride                                   | 0.0328 | 0.0169 |
| 103.075 | C <sub>5</sub> H <sub>11</sub> O <sub>2</sub> <sup>+</sup> | butanonate                                         | 0.0177 | 0.0092 |
| 105.033 | C <sub>7</sub> H <sub>5</sub> O <sup>+</sup>               | C <sub>7</sub> 1-oxy 6 DBE                         | 0.0030 | 0.0023 |
| 105.055 | C <sub>4</sub> H <sub>9</sub> O <sub>3</sub> <sup>+</sup>  | multiple                                           | 0.0295 | 0.0166 |
| 105.091 | C <sub>5</sub> H <sub>13</sub> O <sub>2</sub> <sup>+</sup> | 1,5-pentanediol                                    | 0.0190 | 0.0140 |
| 106.078 | C <sub>8</sub> H <sub>10</sub> <sup>+</sup>                | C <sub>8</sub> aromatic charged transfer           | 0.0010 | 0.0008 |
| 107.086 | C <sub>8</sub> H <sub>11</sub> <sup>+</sup>                | C <sub>8</sub> aromatics                           | 0.0523 | 0.0411 |
| 109.065 | C <sub>7</sub> H <sub>9</sub> O <sup>+</sup>               | cresol                                             | 0.0101 | 0.0075 |
| 109.101 | C <sub>8</sub> H <sub>13</sub> <sup>+</sup>                | terpene fragment                                   | 0.0139 | 0.0249 |
| 111.044 | C <sub>6</sub> H <sub>7</sub> O <sub>2</sub> <sup>+</sup>  | catechol/benzene diol                              | 0.0406 | 0.0319 |
| 111.08  | C <sub>7</sub> H <sub>11</sub> O <sup>+</sup>              | multiple                                           | 0.0149 | 0.0111 |
| 113.023 | C <sub>5</sub> H <sub>5</sub> O <sub>3</sub> <sup>+</sup>  | unknown                                            | 0.0188 | 0.0131 |
| 113.06  | C <sub>6</sub> H <sub>9</sub> O <sub>2</sub> <sup>+</sup>  | unknown                                            | 0.0214 | 0.0108 |
| 113.096 | C <sub>7</sub> H <sub>13</sub> O <sup>+</sup>              | ethyl cyclopentanone/                              | 0.0081 | 0.0049 |
| 115.039 | C <sub>5</sub> H <sub>7</sub> O <sub>3</sub> <sup>+</sup>  | C <sub>5</sub> 3-oxy 3D BE                         | 0.0127 | 0.0090 |
| 115.075 | C <sub>6</sub> H <sub>11</sub> O <sub>2</sub> <sup>+</sup> | C <sub>6</sub> diketone isomers/vinylethyl acetate | 0.0338 | 0.0188 |
| 115.112 | C <sub>7</sub> H <sub>15</sub> O <sup>+</sup>              | dimethylpentanone/heptanone                        | 0.0066 | 0.0050 |
| 117.055 | C <sub>5</sub> H <sub>9</sub> O <sub>3</sub> <sup>+</sup>  | C <sub>5</sub> 3-oxy 2D BE isomers                 | 0.0350 | 0.0148 |
| 117.091 | C <sub>6</sub> H <sub>13</sub> O <sub>2</sub> <sup>+</sup> | ethyl butyrate                                     | 0.0171 | 0.0158 |
| 119.034 | C <sub>4</sub> H <sub>7</sub> O <sub>4</sub> <sup>+</sup>  | succinic acid                                      | 0.1406 | 0.1318 |
| 121.101 | C <sub>9</sub> H <sub>13</sub> <sup>+</sup>                | C <sub>9</sub> aromatics                           | 0.0343 | 0.0286 |
| 123.044 | C <sub>7</sub> H <sub>7</sub> O <sub>2</sub> <sup>+</sup>  | benzoic acid                                       | 0.0151 | 0.0101 |
| 123.08  | C <sub>8</sub> H <sub>11</sub> O <sup>+</sup>              | methylanisole                                      | 0.0030 | 0.0015 |
| 123.117 | C <sub>9</sub> H <sub>15</sub> <sup>+</sup>                | terpene fragment                                   | 0.0086 | 0.0052 |
| 125.096 | C <sub>8</sub> H <sub>13</sub> O <sup>+</sup>              | C <sub>4</sub> substituted furan                   | 0.0080 | 0.0043 |
| 129.091 | C <sub>7</sub> H <sub>13</sub> O <sub>2</sub> <sup>+</sup> | allyl ester isobutyric acid                        | 0.0166 | 0.0091 |
| 129.127 | C <sub>8</sub> H <sub>17</sub> O <sup>+</sup>              | octanal                                            | 0.0146 | 0.0120 |
| 131.034 | C <sub>5</sub> H <sub>7</sub> O <sub>4</sub> <sup>+</sup>  | isoprene oxidation product                         | 0.0127 | 0.0074 |
| 131.07  | C <sub>6</sub> H <sub>11</sub> O <sub>3</sub> <sup>+</sup> | multiple                                           | 0.0169 | 0.0124 |
| 131.107 | C <sub>7</sub> H <sub>15</sub> O <sub>2</sub> <sup>+</sup> | C <sub>7</sub> carboxylic acid                     | 0.0045 | 0.0023 |

|         |                                                             |                                                              |        |        |
|---------|-------------------------------------------------------------|--------------------------------------------------------------|--------|--------|
| 133.05  | C <sub>5</sub> H <sub>9</sub> O <sub>4</sub> <sup>+</sup>   | glutaric acid                                                | 0.0160 | 0.0096 |
| 133.101 | C <sub>10</sub> H <sub>13</sub> <sup>+</sup>                | multiple                                                     | 0.0056 | 0.0045 |
| 136.125 | C <sub>10</sub> H <sub>16</sub> <sup>+</sup>                | monoterpene charged transfer                                 | 0.0039 | 0.0057 |
| 137.132 | C <sub>10</sub> H <sub>17</sub> <sup>+</sup>                | monoterpenes                                                 | 0.8682 | 1.4585 |
| 139.075 | C <sub>8</sub> H <sub>11</sub> O <sub>2</sub> <sup>+</sup>  | 2-methoxy-4-methylphenol                                     | 0.0040 | 0.0028 |
| 139.112 | C <sub>9</sub> H <sub>15</sub> O <sup>+</sup>               | monoterpene oxidation product (e.g., nopinone)               | 0.0527 | 0.0368 |
| 141.055 | C <sub>7</sub> H <sub>9</sub> O <sub>3</sub> <sup>+</sup>   | methoxycatechol                                              | 0.0066 | 0.0033 |
| 141.091 | C <sub>8</sub> H <sub>13</sub> O <sub>2</sub> <sup>+</sup>  | unknown                                                      | 0.0075 | 0.0044 |
| 141.127 | C <sub>9</sub> H <sub>17</sub> O <sup>+</sup>               | trans-2-nonenal                                              | 0.0056 | 0.0029 |
| 143.07  | C <sub>7</sub> H <sub>11</sub> O <sub>3</sub> <sup>+</sup>  | unknown                                                      | 0.0062 | 0.0036 |
| 143.107 | C <sub>8</sub> H <sub>15</sub> O <sub>2</sub> <sup>+</sup>  | unknown                                                      | 0.0128 | 0.0101 |
| 143.143 | C <sub>9</sub> H <sub>19</sub> O <sup>+</sup>               | nonanal/2-nonanone                                           | 0.0341 | 0.0299 |
| 145.086 | C <sub>7</sub> H <sub>13</sub> O <sub>3</sub> <sup>+</sup>  | unknown                                                      | 0.0058 | 0.0029 |
| 145.122 | C <sub>8</sub> H <sub>17</sub> O <sub>2</sub> <sup>+</sup>  | ethyl hexanoate                                              | 0.0033 | 0.0018 |
| 147.065 | C <sub>6</sub> H <sub>11</sub> O <sub>4</sub> <sup>+</sup>  | unknown                                                      | 0.0072 | 0.0042 |
| 149.023 | C <sub>8</sub> H <sub>5</sub> O <sub>3</sub> <sup>+</sup>   | phthalic anhydride                                           | 0.0019 | 0.0018 |
| 149.096 | C <sub>10</sub> H <sub>13</sub> O <sup>+</sup>              | unknown                                                      | 0.0034 | 0.0030 |
| 149.132 | C <sub>11</sub> H <sub>17</sub> <sup>+</sup>                | sesquiterpene fragment                                       | 0.0013 | 0.0011 |
| 151.075 | C <sub>9</sub> H <sub>11</sub> O <sub>2</sub> <sup>+</sup>  | vinyl guaiacol/benzyl acetate                                | 0.0015 | 0.0009 |
| 151.112 | C <sub>10</sub> H <sub>15</sub> O <sup>+</sup>              | monoterpene oxidation product (e.g., pinonaldehyde fragment) | 0.0244 | 0.0165 |
| 153.055 | C <sub>8</sub> H <sub>9</sub> O <sub>3</sub> <sup>+</sup>   | methyl salicylate                                            | 0.0179 | 0.0081 |
| 153.091 | C <sub>9</sub> H <sub>13</sub> O <sub>2</sub> <sup>+</sup>  | unknown                                                      | 0.0050 | 0.0027 |
| 153.127 | C <sub>10</sub> H <sub>17</sub> O <sup>+</sup>              | camphor/monoterpene oxidation product                        | 0.0230 | 0.0150 |
| 155.07  | C <sub>8</sub> H <sub>11</sub> O <sub>3</sub> <sup>+</sup>  | syringol                                                     | 0.0025 | 0.0016 |
| 155.107 | C <sub>9</sub> H <sub>15</sub> O <sub>2</sub> <sup>+</sup>  | monoterpene oxidation product                                | 0.0060 | 0.0044 |
| 155.143 | C <sub>10</sub> H <sub>19</sub> O <sup>+</sup>              | linalool                                                     | 0.0091 | 0.0130 |
| 157.086 | C <sub>8</sub> H <sub>13</sub> O <sub>3</sub> <sup>+</sup>  | monoterpene oxidation product (e.g., terpenylic acid)        | 0.0057 | 0.0032 |
| 157.122 | C <sub>9</sub> H <sub>17</sub> O <sub>2</sub> <sup>+</sup>  | C <sub>9</sub> 2-oxy 2DBE isomers                            | 0.0110 | 0.0064 |
| 157.159 | C <sub>10</sub> H <sub>21</sub> O <sup>+</sup>              | menthol-type monoterpenes/ decanal                           | 0.0189 | 0.0471 |
| 159.065 | C <sub>7</sub> H <sub>11</sub> O <sub>4</sub> <sup>+</sup>  | 3,6-oxoheptanoic acid                                        | 0.0045 | 0.0024 |
| 159.102 | C <sub>8</sub> H <sub>15</sub> O <sub>3</sub> <sup>+</sup>  | monoterpene oxidation product                                | 0.0046 | 0.0036 |
| 159.138 | C <sub>9</sub> H <sub>19</sub> O <sub>2</sub> <sup>+</sup>  | methyl octanoate                                             | 0.0027 | 0.0015 |
| 161.081 | C <sub>7</sub> H <sub>13</sub> O <sub>4</sub> <sup>+</sup>  | unknown                                                      | 0.0032 | 0.0019 |
| 165.055 | C <sub>9</sub> H <sub>9</sub> O <sub>3</sub> <sup>+</sup>   | unknown                                                      | 0.0007 | 0.0006 |
| 167.034 | C <sub>8</sub> H <sub>7</sub> O <sub>4</sub> <sup>+</sup>   | terephthalic acid                                            | 0.0047 | 0.0034 |
| 167.107 | C <sub>10</sub> H <sub>15</sub> O <sub>2</sub> <sup>+</sup> | monoterpene oxidation product                                | 0.0063 | 0.0033 |
| 169.05  | C <sub>8</sub> H <sub>9</sub> O <sub>4</sub> <sup>+</sup>   | C <sub>8</sub> 4-oxy 5-DBE                                   | 0.0006 | 0.0005 |
| 169.086 | C <sub>9</sub> H <sub>13</sub> O <sub>3</sub> <sup>+</sup>  | C <sub>9</sub> 3-oxy 4-DBE                                   | 0.0021 | 0.0013 |
| 169.122 | C <sub>10</sub> H <sub>17</sub> O <sub>2</sub> <sup>+</sup> | monoterpene oxidation product (e.g. pinonaldehyde)           | 0.0216 | 0.0160 |
| 171.029 | C <sub>7</sub> H <sub>7</sub> O <sub>5</sub> <sup>+</sup>   | unknown                                                      | 0.0014 | 0.0011 |
| 171.065 | C <sub>8</sub> H <sub>11</sub> O <sub>4</sub> <sup>+</sup>  | unknown                                                      | 0.0012 | 0.0006 |

|         |                                                             |                                                                |        |        |
|---------|-------------------------------------------------------------|----------------------------------------------------------------|--------|--------|
| 171.102 | C <sub>9</sub> H <sub>15</sub> O <sub>3</sub> <sup>+</sup>  | monoterpene oxidation product                                  | 0.0048 | 0.0024 |
| 171.138 | C <sub>10</sub> H <sub>19</sub> O <sub>2</sub> <sup>+</sup> | linalool oxide                                                 | 0.0066 | 0.0040 |
| 173.044 | C <sub>7</sub> H <sub>9</sub> O <sub>5</sub> <sup>+</sup>   | toluene oxidation product                                      | 0.0007 | 0.0005 |
| 173.081 | C <sub>8</sub> H <sub>13</sub> O <sub>4</sub> <sup>+</sup>  | monoterpene oxidation product                                  | 0.0020 | 0.0013 |
| 173.117 | C <sub>9</sub> H <sub>17</sub> O <sub>3</sub> <sup>+</sup>  | unknown                                                        | 0.0014 | 0.0016 |
| 173.154 | C <sub>10</sub> H <sub>21</sub> O <sub>2</sub> <sup>+</sup> | unknown                                                        | 0.0016 | 0.0011 |
| 175.06  | C <sub>7</sub> H <sub>11</sub> O <sub>5</sub> <sup>+</sup>  | unknown                                                        | 0.0024 | 0.0013 |
| 175.096 | C <sub>8</sub> H <sub>15</sub> O <sub>4</sub> <sup>+</sup>  | monoterpene oxidation product                                  | 0.0014 | 0.0009 |
| 183.102 | C <sub>10</sub> H <sub>15</sub> O <sub>3</sub> <sup>+</sup> | monoterpene oxidation product                                  | 0.0026 | 0.0014 |
| 185.117 | C <sub>10</sub> H <sub>17</sub> O <sub>3</sub> <sup>+</sup> | monoterpene oxidation product (e.g., <i>cis</i> -pinonic acid) | 0.0066 | 0.0037 |
| 185.154 | C <sub>11</sub> H <sub>21</sub> O <sub>2</sub> <sup>+</sup> | unknown                                                        | 0.0007 | 0.0004 |
| 187.096 | C <sub>9</sub> H <sub>15</sub> O <sub>4</sub> <sup>+</sup>  | monoterpene oxidation product (e.g., pinic acid)               | 0.0018 | 0.0009 |
| 189.076 | C <sub>8</sub> H <sub>13</sub> O <sub>5</sub> <sup>+</sup>  | monoterpene oxidation product                                  | 0.0009 | 0.0005 |
| 189.149 | C <sub>10</sub> H <sub>21</sub> O <sub>3</sub> <sup>+</sup> | unknown                                                        | 0.0002 | 0.0002 |
| 193.159 | C <sub>13</sub> H <sub>21</sub> O <sup>+</sup>              | unknown                                                        | 0.0004 | 0.0010 |
| 195.138 | C <sub>12</sub> H <sub>19</sub> O <sub>2</sub> <sup>+</sup> | unknown                                                        | 0.0004 | 0.0002 |
| 197.081 | C <sub>10</sub> H <sub>13</sub> O <sub>4</sub> <sup>+</sup> | unknown                                                        | 0.0003 | 0.0002 |
| 197.117 | C <sub>11</sub> H <sub>17</sub> O <sub>3</sub> <sup>+</sup> | unknown                                                        | 0.0004 | 0.0002 |
| 197.154 | C <sub>12</sub> H <sub>21</sub> O <sub>2</sub> <sup>+</sup> | unknown                                                        | 0.0002 | 0.0002 |
| 199.096 | C <sub>10</sub> H <sub>15</sub> O <sub>4</sub> <sup>+</sup> | monoterpene oxidation product                                  | 0.0010 | 0.0005 |
| 199.133 | C <sub>11</sub> H <sub>19</sub> O <sub>3</sub> <sup>+</sup> | unknown                                                        | 0.0007 | 0.0003 |
| 201.112 | C <sub>10</sub> H <sub>17</sub> O <sub>4</sub> <sup>+</sup> | monoterpene oxidation product                                  | 0.0011 | 0.0006 |
| 203.091 | C <sub>9</sub> H <sub>15</sub> O <sub>5</sub> <sup>+</sup>  | monoterpene oxidation product                                  | 0.0004 | 0.0003 |
| 203.128 | C <sub>10</sub> H <sub>19</sub> O <sub>4</sub> <sup>+</sup> | unknown                                                        | 0.0002 | 0.0002 |
| 205.071 | C <sub>8</sub> H <sub>13</sub> O <sub>6</sub> <sup>+</sup>  | monoterpene oxidation product                                  | 0.0003 | 0.0002 |
| 205.195 | C <sub>15</sub> H <sub>25</sub> <sup>+</sup>                | sesquiterpenes                                                 | 0.0039 | 0.0037 |
| 209.154 | C <sub>13</sub> H <sub>21</sub> O <sub>2</sub> <sup>+</sup> | unknown                                                        | 0.0004 | 0.0003 |
| 213.076 | C <sub>10</sub> H <sub>13</sub> O <sub>5</sub> <sup>+</sup> | monoterpene oxidation product                                  | 0.0002 | 0.0001 |
| 215.091 | C <sub>10</sub> H <sub>15</sub> O <sub>5</sub> <sup>+</sup> | monoterpene oxidation product                                  | 0.0003 | 0.0002 |
| 215.128 | C <sub>11</sub> H <sub>19</sub> O <sub>4</sub> <sup>+</sup> | unknown                                                        | 0.0002 | 0.0002 |
| 217.107 | C <sub>10</sub> H <sub>17</sub> O <sub>5</sub> <sup>+</sup> | monoterpene oxidation product                                  | 0.0003 | 0.0001 |
| 217.143 | C <sub>11</sub> H <sub>21</sub> O <sub>4</sub> <sup>+</sup> | unknown                                                        | 0.0001 | 0.0001 |
| 223.169 | C <sub>14</sub> H <sub>23</sub> O <sub>2</sub> <sup>+</sup> | sesquiterpene oxidation product                                | 0.0003 | 0.0011 |

**Table S4.** Comparison of 112 VOC ions measured by Vocus-PTR-ToF-MS to those measured by CHARON-PTR-ToF-MS during second measurement period (22<sup>nd</sup>-30<sup>th</sup> June 2020).

| No. | VOC ions                                                   | Pearson's r | Slope  | Intercept | No. | VOC ions                                                   | Pearson's r | Slope  | Intercept |
|-----|------------------------------------------------------------|-------------|--------|-----------|-----|------------------------------------------------------------|-------------|--------|-----------|
| 1   | C <sub>3</sub> H <sub>5</sub> <sup>+</sup>                 | 0.10        | 0.002  | 0.097     | 57  | C <sub>7</sub> H <sub>13</sub> O <sub>2</sub> <sup>+</sup> | <b>0.86</b> | 2.170  | 0.002     |
| 2   | C <sub>3</sub> H <sub>7</sub> <sup>+</sup>                 | 0.08        | 0.004  | 0.077     | 58  | C <sub>8</sub> H <sub>17</sub> O <sup>+</sup>              | 0.01        | 0.119  | 0.012     |
| 3   | C <sub>2</sub> H <sub>7</sub> O <sup>+</sup>               | <b>0.74</b> | 4.405  | 0.083     | 59  | C <sub>5</sub> H <sub>7</sub> O <sub>4</sub> <sup>+</sup>  | <b>0.67</b> | 3.582  | -0.008    |
| 4   | C <sub>4</sub> H <sub>5</sub> <sup>+</sup>                 | 0.38        | 0.038  | 0.011     | 60  | C <sub>6</sub> H <sub>11</sub> O <sub>3</sub> <sup>+</sup> | 0.11        | 2.379  | 0.013     |
| 5   | C <sub>3</sub> H <sub>7</sub> O <sup>+</sup>               | <b>0.82</b> | 0.429  | 0.030     | 61  | C <sub>7</sub> H <sub>15</sub> O <sub>2</sub> <sup>+</sup> | <b>0.65</b> | 2.148  | 0.004     |
| 6   | C <sub>2</sub> H <sub>5</sub> O <sub>2</sub> <sup>+</sup>  | <b>0.81</b> | 0.849  | -0.164    | 62  | C <sub>5</sub> H <sub>9</sub> O <sub>4</sub> <sup>+</sup>  | 0.18        | 1.535  | 0.017     |
| 7   | CH <sub>5</sub> O <sub>3</sub> <sup>+</sup>                | -0.31       | -0.036 | 0.001     | 63  | C <sub>10</sub> H <sub>13</sub> <sup>+</sup>               | <b>0.54</b> | 0.307  | 0.003     |
| 8   | C <sub>5</sub> H <sub>7</sub> <sup>+</sup>                 | 0.41        | 0.110  | 0.019     | 64  | C <sub>10</sub> H <sub>17</sub> <sup>+</sup>               | <b>0.59</b> | 0.559  | 0.252     |
| 9   | C <sub>4</sub> H <sub>5</sub> O <sup>+</sup>               | 0.39        | 0.205  | 0.004     | 65  | C <sub>8</sub> H <sub>11</sub> O <sub>2</sub> <sup>+</sup> | 0.41        | 0.239  | 0.003     |
| 10  | C <sub>5</sub> H <sub>9</sub> <sup>+</sup>                 | <b>0.92</b> | 1.652  | 0.025     | 66  | C <sub>9</sub> H <sub>15</sub> O <sup>+</sup>              | <b>0.93</b> | 2.903  | 0.001     |
| 11  | C <sub>4</sub> H <sub>7</sub> O <sup>+</sup>               | <b>0.94</b> | 1.292  | -0.002    | 67  | C <sub>7</sub> H <sub>9</sub> O <sub>3</sub> <sup>+</sup>  | <b>0.69</b> | 0.543  | 0.001     |
| 12  | C <sub>3</sub> H <sub>5</sub> O <sub>2</sub> <sup>+</sup>  | <b>0.75</b> | 0.775  | -0.021    | 68  | C <sub>8</sub> H <sub>13</sub> O <sub>2</sub> <sup>+</sup> | <b>0.76</b> | 1.004  | 0.003     |
| 13  | C <sub>4</sub> H <sub>9</sub> O <sup>+</sup>               | <b>0.96</b> | 2.256  | -0.053    | 69  | C <sub>9</sub> H <sub>17</sub> O <sup>+</sup>              | <b>0.55</b> | 2.281  | 0.000     |
| 14  | C <sub>3</sub> H <sub>7</sub> O <sub>2</sub> <sup>+</sup>  | <b>0.89</b> | 2.842  | -0.001    | 70  | C <sub>7</sub> H <sub>11</sub> O <sub>3</sub> <sup>+</sup> | <b>0.73</b> | 1.841  | 0.001     |
| 15  | C <sub>3</sub> H <sub>9</sub> O <sub>2</sub> <sup>+</sup>  | <b>0.50</b> | 16.469 | 0.185     | 71  | C <sub>8</sub> H <sub>15</sub> O <sub>2</sub> <sup>+</sup> | 0.17        | 1.030  | 0.008     |
| 16  | C <sub>6</sub> H <sub>7</sub> <sup>+</sup>                 | 0.33        | 0.313  | 0.079     | 72  | C <sub>9</sub> H <sub>19</sub> O <sup>+</sup>              | 0.20        | 22.151 | 0.021     |
| 17  | C <sub>6</sub> H <sub>9</sub> <sup>+</sup>                 | <b>0.55</b> | 0.201  | 0.188     | 73  | C <sub>7</sub> H <sub>13</sub> O <sub>3</sub> <sup>+</sup> | <b>0.68</b> | 5.837  | 0.005     |
| 18  | C <sub>5</sub> H <sub>7</sub> O <sup>+</sup>               | <b>0.82</b> | 0.987  | 0.002     | 74  | C <sub>8</sub> H <sub>17</sub> O <sub>2</sub> <sup>+</sup> | <b>0.53</b> | 1.393  | 0.005     |
| 19  | C <sub>6</sub> H <sub>11</sub> <sup>+</sup>                | 0.21        | 0.910  | 0.039     | 75  | C <sub>6</sub> H <sub>11</sub> O <sub>4</sub> <sup>+</sup> | <b>0.54</b> | 3.029  | 0.003     |
| 20  | C <sub>4</sub> H <sub>5</sub> O <sub>2</sub> <sup>+</sup>  | <b>0.71</b> | 0.629  | -0.004    | 76  | C <sub>8</sub> H <sub>5</sub> O <sub>3</sub> <sup>+</sup>  | <b>0.72</b> | 0.256  | 0.001     |
| 21  | C <sub>5</sub> H <sub>9</sub> O <sup>+</sup>               | <b>0.82</b> | 1.702  | 0.004     | 77  | C <sub>10</sub> H <sub>13</sub> O <sup>+</sup>             | <b>0.76</b> | 0.627  | -0.001    |
| 22  | C <sub>4</sub> H <sub>7</sub> O <sub>2</sub> <sup>+</sup>  | <b>0.72</b> | 4.300  | -0.051    | 78  | C <sub>11</sub> H <sub>17</sub> <sup>+</sup>               | 0.37        | 0.311  | 0.002     |
| 23  | C <sub>5</sub> H <sub>11</sub> O <sup>+</sup>              | 0.44        | 3.108  | 0.005     | 79  | C <sub>9</sub> H <sub>11</sub> O <sub>2</sub> <sup>+</sup> | 0.48        | 0.254  | 0.001     |
| 24  | C <sub>4</sub> H <sub>9</sub> O <sub>2</sub> <sup>+</sup>  | <b>0.66</b> | 17.104 | -0.112    | 80  | C <sub>10</sub> H <sub>15</sub> O <sup>+</sup>             | <b>0.87</b> | 1.911  | 0.006     |
| 25  | C <sub>3</sub> H <sub>7</sub> O <sub>3</sub> <sup>+</sup>  | 0.23        | 0.347  | 0.023     | 81  | C <sub>8</sub> H <sub>9</sub> O <sub>3</sub> <sup>+</sup>  | <b>0.85</b> | 1.025  | 0.004     |
| 26  | C <sub>4</sub> H <sub>11</sub> O <sub>2</sub> <sup>+</sup> | <b>0.77</b> | 15.001 | -0.273    | 82  | C <sub>9</sub> H <sub>13</sub> O <sub>2</sub> <sup>+</sup> | -0.04       | -0.048 | 0.006     |
| 27  | C <sub>7</sub> H <sub>9</sub> <sup>+</sup>                 | <b>0.66</b> | 0.499  | 0.056     | 83  | C <sub>10</sub> H <sub>17</sub> O <sup>+</sup>             | <b>0.85</b> | 1.374  | 0.003     |
| 28  | C <sub>6</sub> H <sub>7</sub> O <sup>+</sup>               | <b>0.50</b> | 3.027  | -0.045    | 84  | C <sub>8</sub> H <sub>11</sub> O <sub>3</sub> <sup>+</sup> | <b>0.88</b> | 0.355  | 0.000     |
| 29  | C <sub>7</sub> H <sub>11</sub> <sup>+</sup>                | 0.45        | 0.103  | 0.023     | 85  | C <sub>9</sub> H <sub>15</sub> O <sub>2</sub> <sup>+</sup> | 0.37        | 1.035  | 0.006     |
| 30  | C <sub>5</sub> H <sub>5</sub> O <sub>2</sub> <sup>+</sup>  | <b>0.53</b> | 0.967  | -0.005    | 86  | C <sub>10</sub> H <sub>19</sub> O <sup>+</sup>             | 0.05        | 0.506  | 0.003     |
| 31  | C <sub>6</sub> H <sub>9</sub> O <sup>+</sup>               | <b>0.77</b> | 0.405  | 0.005     | 87  | C <sub>8</sub> H <sub>13</sub> O <sub>3</sub> <sup>+</sup> | 0.46        | 2.795  | 0.005     |



|    |                                                            |             |       |        |     |                                                             |             |        |        |
|----|------------------------------------------------------------|-------------|-------|--------|-----|-------------------------------------------------------------|-------------|--------|--------|
| 32 | C <sub>7</sub> H <sub>13</sub> <sup>+</sup>                | 0.07        | 0.220 | 0.015  | 88  | C <sub>9</sub> H <sub>17</sub> O <sub>2</sub> <sup>+</sup>  | <b>0.62</b> | 2.958  | 0.003  |
| 33 | C <sub>5</sub> H <sub>7</sub> O <sub>2</sub> <sup>+</sup>  | <b>0.62</b> | 1.275 | -0.001 | 89  | C <sub>10</sub> H <sub>21</sub> O <sup>+</sup>              | 0.11        | 25.598 | 0.019  |
| 34 | C <sub>6</sub> H <sub>11</sub> O <sup>+</sup>              | <b>0.91</b> | 3.464 | 0.001  | 90  | C <sub>7</sub> H <sub>11</sub> O <sub>4</sub> <sup>+</sup>  | <b>0.81</b> | 2.565  | -0.001 |
| 35 | C <sub>5</sub> H <sub>9</sub> O <sub>2</sub> <sup>+</sup>  | <b>0.52</b> | 1.931 | 0.039  | 91  | C <sub>9</sub> H <sub>9</sub> O <sub>3</sub> <sup>+</sup>   | <b>0.53</b> | 0.327  | 0.000  |
| 36 | C <sub>6</sub> H <sub>13</sub> O <sup>+</sup>              | <b>0.77</b> | 6.056 | -0.003 | 92  | C <sub>8</sub> H <sub>7</sub> O <sub>4</sub> <sup>+</sup>   | <b>0.64</b> | 3.022  | -0.003 |
| 37 | C <sub>4</sub> H <sub>7</sub> O <sub>3</sub> <sup>+</sup>  | <b>0.80</b> | 4.988 | -0.008 | 93  | C <sub>10</sub> H <sub>15</sub> O <sub>2</sub> <sup>+</sup> | <b>0.79</b> | 1.203  | 0.001  |
| 38 | C <sub>5</sub> H <sub>11</sub> O <sub>2</sub> <sup>+</sup> | <b>0.71</b> | 2.424 | 0.009  | 94  | C <sub>8</sub> H <sub>9</sub> O <sub>4</sub> <sup>+</sup>   | <b>0.53</b> | 0.147  | 0.000  |
| 39 | C <sub>8</sub> H <sub>11</sub> <sup>+</sup>                | <b>0.85</b> | 0.861 | 0.016  | 95  | C <sub>9</sub> H <sub>13</sub> O <sub>3</sub> <sup>+</sup>  | <b>0.67</b> | 0.543  | 0.001  |
| 40 | C <sub>7</sub> H <sub>9</sub> O <sub>1</sub> <sup>+</sup>  | <b>0.50</b> | 0.664 | 0.006  | 96  | C <sub>10</sub> H <sub>17</sub> O <sub>2</sub> <sup>+</sup> | <b>0.57</b> | 8.491  | -0.004 |
| 41 | C <sub>8</sub> H <sub>13</sub> <sup>+</sup>                | 0.10        | 0.172 | 0.015  | 97  | C <sub>7</sub> H <sub>7</sub> O <sub>5</sub> <sup>+</sup>   | 0.17        | 0.367  | 0.002  |
| 42 | C <sub>6</sub> H <sub>7</sub> O <sub>2</sub> <sup>+</sup>  | <b>0.64</b> | 2.227 | -0.010 | 98  | C <sub>8</sub> H <sub>11</sub> O <sub>4</sub> <sup>+</sup>  | <b>0.69</b> | 0.132  | 0.000  |
| 43 | C <sub>7</sub> H <sub>11</sub> O <sup>+</sup>              | <b>0.85</b> | 1.352 | 0.000  | 99  | C <sub>9</sub> H <sub>15</sub> O <sub>3</sub> <sup>+</sup>  | <b>0.57</b> | 1.675  | 0.005  |
| 44 | C <sub>5</sub> H <sub>5</sub> O <sub>3</sub> <sup>+</sup>  | <b>0.74</b> | 0.843 | 0.002  | 100 | C <sub>7</sub> H <sub>9</sub> O <sub>5</sub> <sup>+</sup>   | 0.39        | 0.274  | 0.000  |
| 45 | C <sub>6</sub> H <sub>9</sub> O <sub>2</sub> <sup>+</sup>  | <b>0.88</b> | 1.172 | -0.004 | 101 | C <sub>8</sub> H <sub>13</sub> O <sub>4</sub> <sup>+</sup>  | <b>0.74</b> | 0.982  | 0.000  |
| 46 | C <sub>7</sub> H <sub>13</sub> O <sup>+</sup>              | <b>0.89</b> | 3.037 | 0.003  | 102 | C <sub>10</sub> H <sub>21</sub> O <sub>2</sub> <sup>+</sup> | 0.23        | 0.208  | 0.002  |
| 47 | C <sub>5</sub> H <sub>7</sub> O <sub>3</sub> <sup>+</sup>  | 0.26        | 0.381 | 0.004  | 103 | C <sub>7</sub> H <sub>11</sub> O <sub>5</sub> <sup>+</sup>  | <b>0.71</b> | 1.546  | 0.001  |
| 48 | C <sub>6</sub> H <sub>11</sub> O <sub>2</sub> <sup>+</sup> | <b>0.91</b> | 2.246 | -0.001 | 104 | C <sub>8</sub> H <sub>15</sub> O <sub>4</sub> <sup>+</sup>  | 0.37        | 1.602  | 0.001  |
| 49 | C <sub>7</sub> H <sub>15</sub> O <sup>+</sup>              | <b>0.63</b> | 3.979 | 0.001  | 105 | C <sub>10</sub> H <sub>15</sub> O <sub>3</sub> <sup>+</sup> | <b>0.72</b> | 0.867  | 0.000  |
| 50 | C <sub>5</sub> H <sub>9</sub> O <sub>3</sub> <sup>+</sup>  | <b>0.70</b> | 8.684 | 0.004  | 106 | C <sub>10</sub> H <sub>17</sub> O <sub>3</sub> <sup>+</sup> | 0.23        | 0.819  | 0.006  |
| 51 | C <sub>6</sub> H <sub>13</sub> O <sub>2</sub> <sup>+</sup> | 0.42        | 4.490 | 0.015  | 107 | C <sub>9</sub> H <sub>15</sub> O <sub>4</sub> <sup>+</sup>  | 0.48        | 0.607  | 0.001  |
| 52 | C <sub>9</sub> H <sub>13</sub> <sup>+</sup>                | <b>0.82</b> | 0.826 | 0.008  | 108 | C <sub>8</sub> H <sub>13</sub> O <sub>5</sub> <sup>+</sup>  | <b>0.77</b> | 0.589  | 0.000  |
| 53 | C <sub>7</sub> H <sub>7</sub> O <sub>2</sub> <sup>+</sup>  | <b>0.61</b> | 0.982 | 0.003  | 109 | C <sub>10</sub> H <sub>13</sub> O <sub>4</sub> <sup>+</sup> | 0.37        | 0.071  | 0.000  |
| 54 | C <sub>8</sub> H <sub>11</sub> O <sup>+</sup>              | <b>0.73</b> | 0.387 | 0.001  | 110 | C <sub>10</sub> H <sub>15</sub> O <sub>4</sub> <sup>+</sup> | <b>0.53</b> | 0.097  | 0.000  |
| 55 | C <sub>9</sub> H <sub>15</sub> <sup>+</sup>                | <b>0.66</b> | 0.583 | 0.004  | 111 | C <sub>15</sub> H <sub>25</sub> <sup>+</sup>                | <b>0.71</b> | 0.554  | -0.001 |
| 56 | C <sub>8</sub> H <sub>13</sub> O <sup>+</sup>              | <b>0.59</b> | 0.910 | 0.003  | 112 | C <sub>10</sub> H <sub>15</sub> O <sub>5</sub> <sup>+</sup> | <b>0.87</b> | 0.147  | 0.002  |

200 The Pearson's r was >0.5 in bold.

201 **References**

- 202 Bosque, R. and Sales, J.: Polarizabilities of Solvents from the Chemical Composition, *Journal of*  
203 *Chemical Information and Computer Sciences*, 42, 1154-1163, 10.1021/ci025528x, 2002.
- 204 Coggon, M. M., Stockwell, C. E., Xu, L., Peischl, J., Gilman, J. B., Lamplugh, A., Bowman, H. J.,  
205 Aikin, K., Harkins, C., Zhu, Q., Schwantes, R. H., He, J., Li, M., Seltzer, K., McDonald,  
206 B., and Warneke, C.: Contribution of cooking emissions to the urban volatile organic  
207 compounds in Las Vegas, NV, *Atmos. Chem. Phys.*, 24, 4289-4304, 10.5194/acp-24-4289-  
208 2024, 2024.
- 209 Gioumousis, G. and Stevenson, D. P.: Reactions of Gaseous Molecule Ions with Gaseous  
210 Molecules. V. Theory, *The Journal of Chemical Physics*, 29, 294-299, 10.1063/1.1744477,  
211 1958.
- 212 Karl, T., Hansel, A., Cappellin, L., Kaser, L., Herdlinger-Blatt, I., and Jud, W.: Selective  
213 measurements of isoprene and 2-methyl-3-buten-2-ol based on NO<sup>+</sup>  
214 ionization mass spectrometry, *Atmos. Chem. Phys.*, 12, 11877-11884, 10.5194/acp-12-  
215 11877-2012, 2012.
- 216 Leglise, J., Müller, M., Piel, F., Otto, T., and Wisthaler, A.: Bulk Organic Aerosol Analysis by  
217 Proton-Transfer-Reaction Mass Spectrometry: An Improved Methodology for the  
218 Determination of Total Organic Mass, O:C and H:C Elemental Ratios, and the Average  
219 Molecular Formula, *Anal. Chem.*, 91, 12619-12624, 10.1021/acs.analchem.9b02949, 2019.
- 220 Müller, M., Eichler, P., D'Anna, B., Tan, W., and Wisthaler, A.: Direct Sampling and Analysis of  
221 Atmospheric Particulate Organic Matter by Proton-Transfer-Reaction Mass Spectrometry,  
222 *Anal. Chem.*, 89, 10889-10897, 10.1021/acs.analchem.7b02582, 2017.
- 223 Pfannerstill, E. Y., Arata, C., Zhu, Q., Schulze, B. C., Woods, R., Seinfeld, J. H., Bucholtz, A.,  
224 Cohen, R. C., and Goldstein, A. H.: Volatile organic compound fluxes in the agricultural  
225 San Joaquin Valley – spatial distribution, source attribution, and inventory comparison,  
226 *Atmos. Chem. Phys.*, 23, 12753-12780, 10.5194/acp-23-12753-2023, 2023.
- 227 Piel, F., Müller, M., Winkler, K., Skytte af Sättra, J., and Wisthaler, A.: Introducing the extended  
228 volatility range proton-transfer-reaction mass spectrometer (EVR PTR-MS), *Atmos. Meas.*  
229 *Tech.*, 14, 1355-1363, 10.5194/amt-14-1355-2021, 2021.
- 230 Su, T. and Chesnavich, W. J.: Parametrization of the ion–polar molecule collision rate constant by  
231 trajectory calculations, *The Journal of Chemical Physics*, 76, 5183-5185, 10.1063/1.442828,  
232 1982.
- 233 Yuan, B., Koss, A. R., Warneke, C., Coggon, M., Sekimoto, K., and de Gouw, J. A.: Proton-  
234 Transfer-Reaction Mass Spectrometry: Applications in Atmospheric Sciences, *Chemical*  
235 *Reviews*, 117, 13187-13229, 10.1021/acs.chemrev.7b00325, 2017.

236
